# Supplementary material
Source: MDPI journal article supplement (https://www.mdpi.com/2071-1050/7/11/14917)

**Hazelnut - bag**  
CFP inventory data [ $\text{CO}_{2\text{eq}}$  / kg]

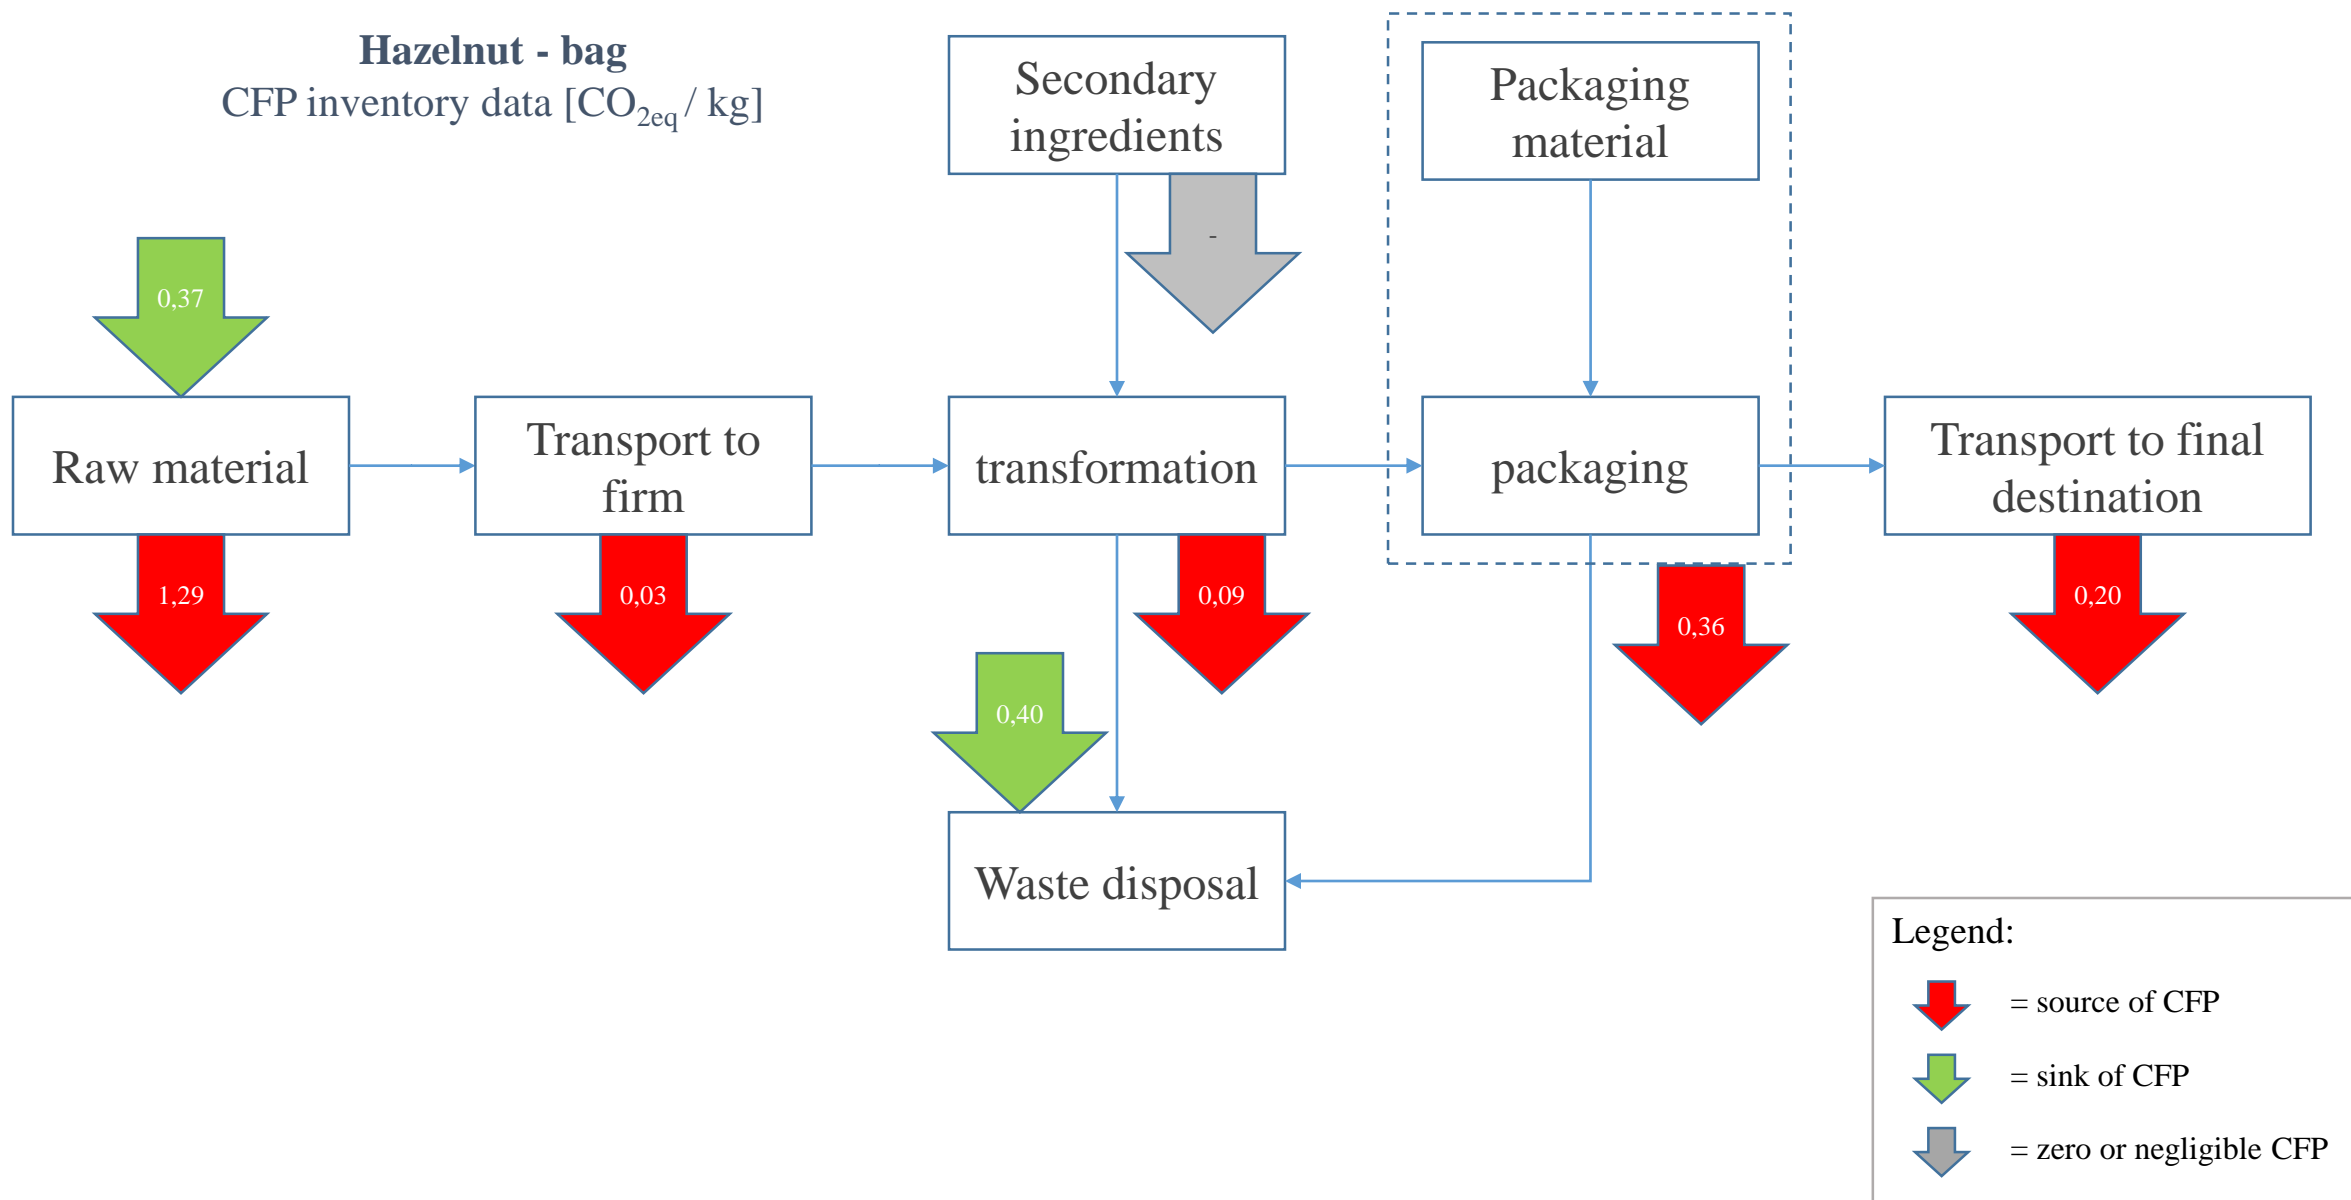

## Peanut - bag

CFP inventory data [ $\text{CO}_{2\text{eq}}/\text{kg}$ ]

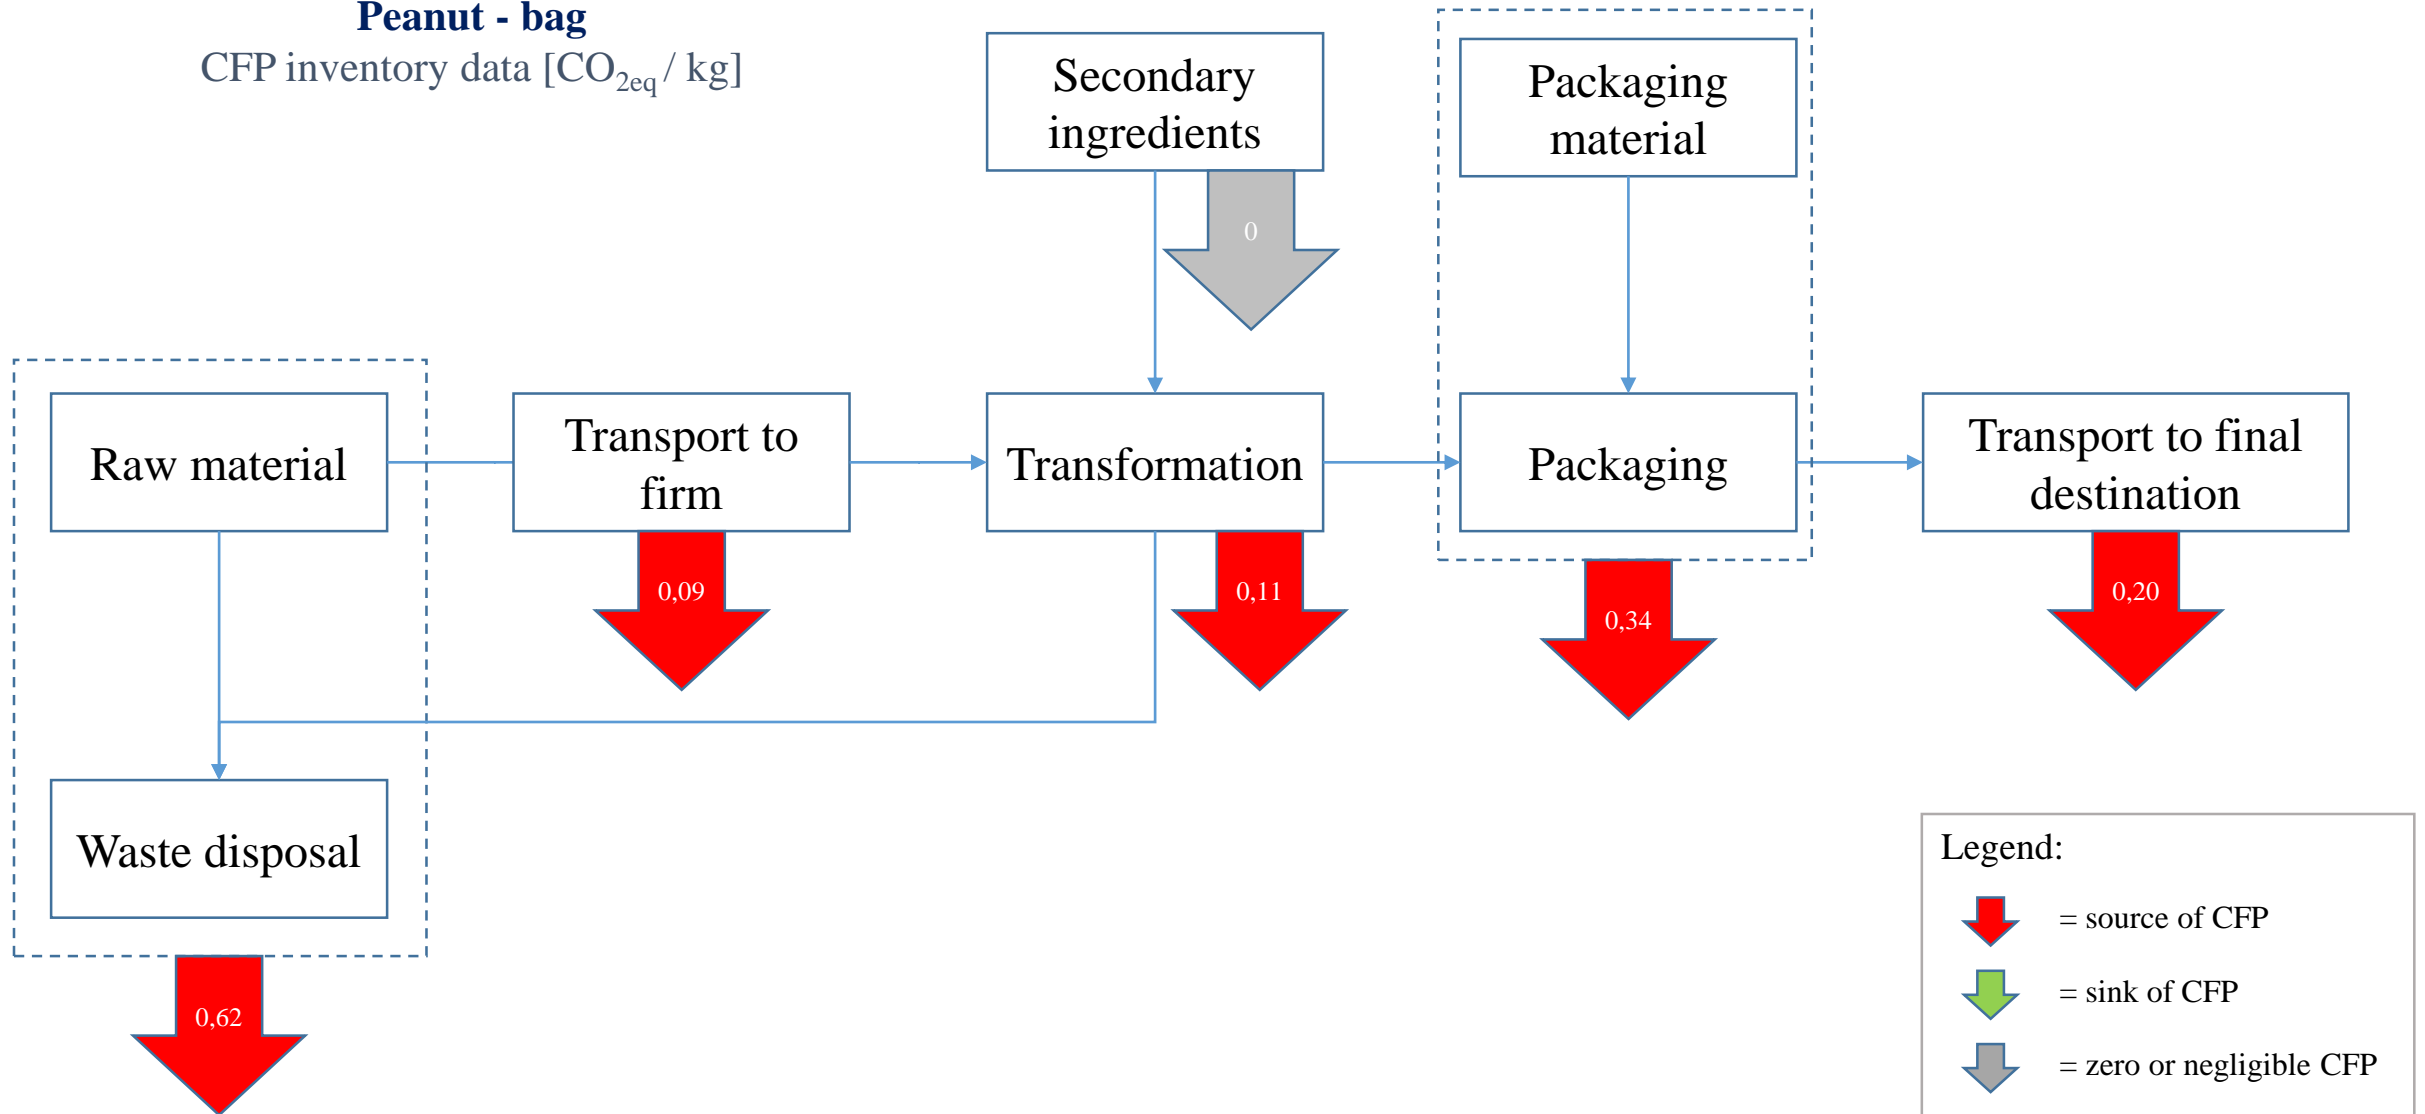

**Hazelnut paste US**  
CFP inventory data [ $\text{CO}_{2\text{eq}} / \text{kg}$ ]

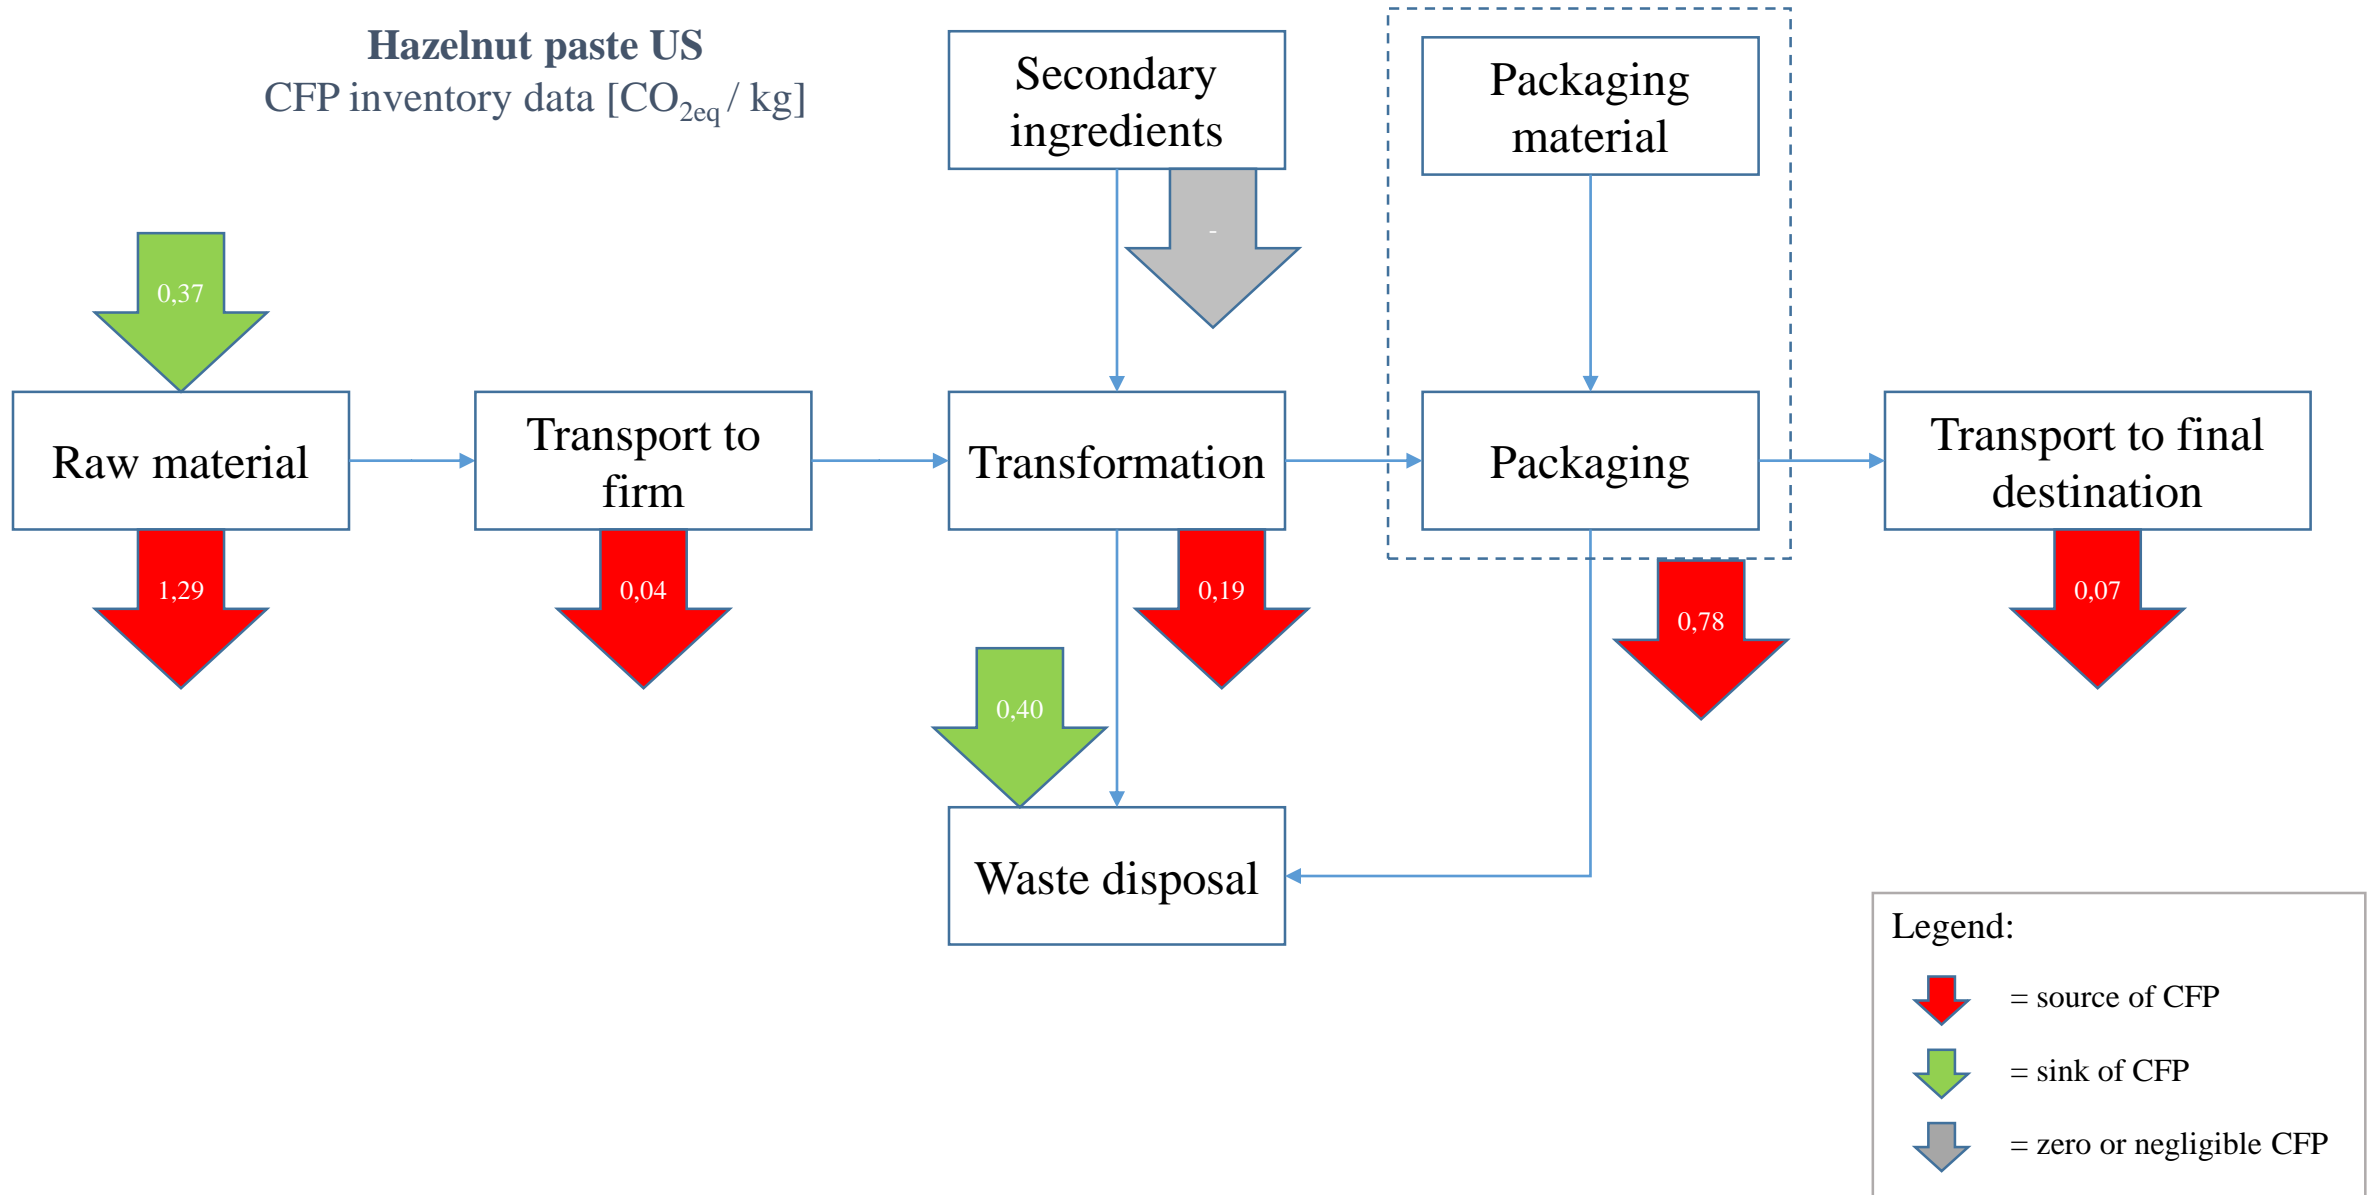

**Peanut paste US**  
CFP inventory data [ $\text{CO}_{2\text{eq}}$  / kg]

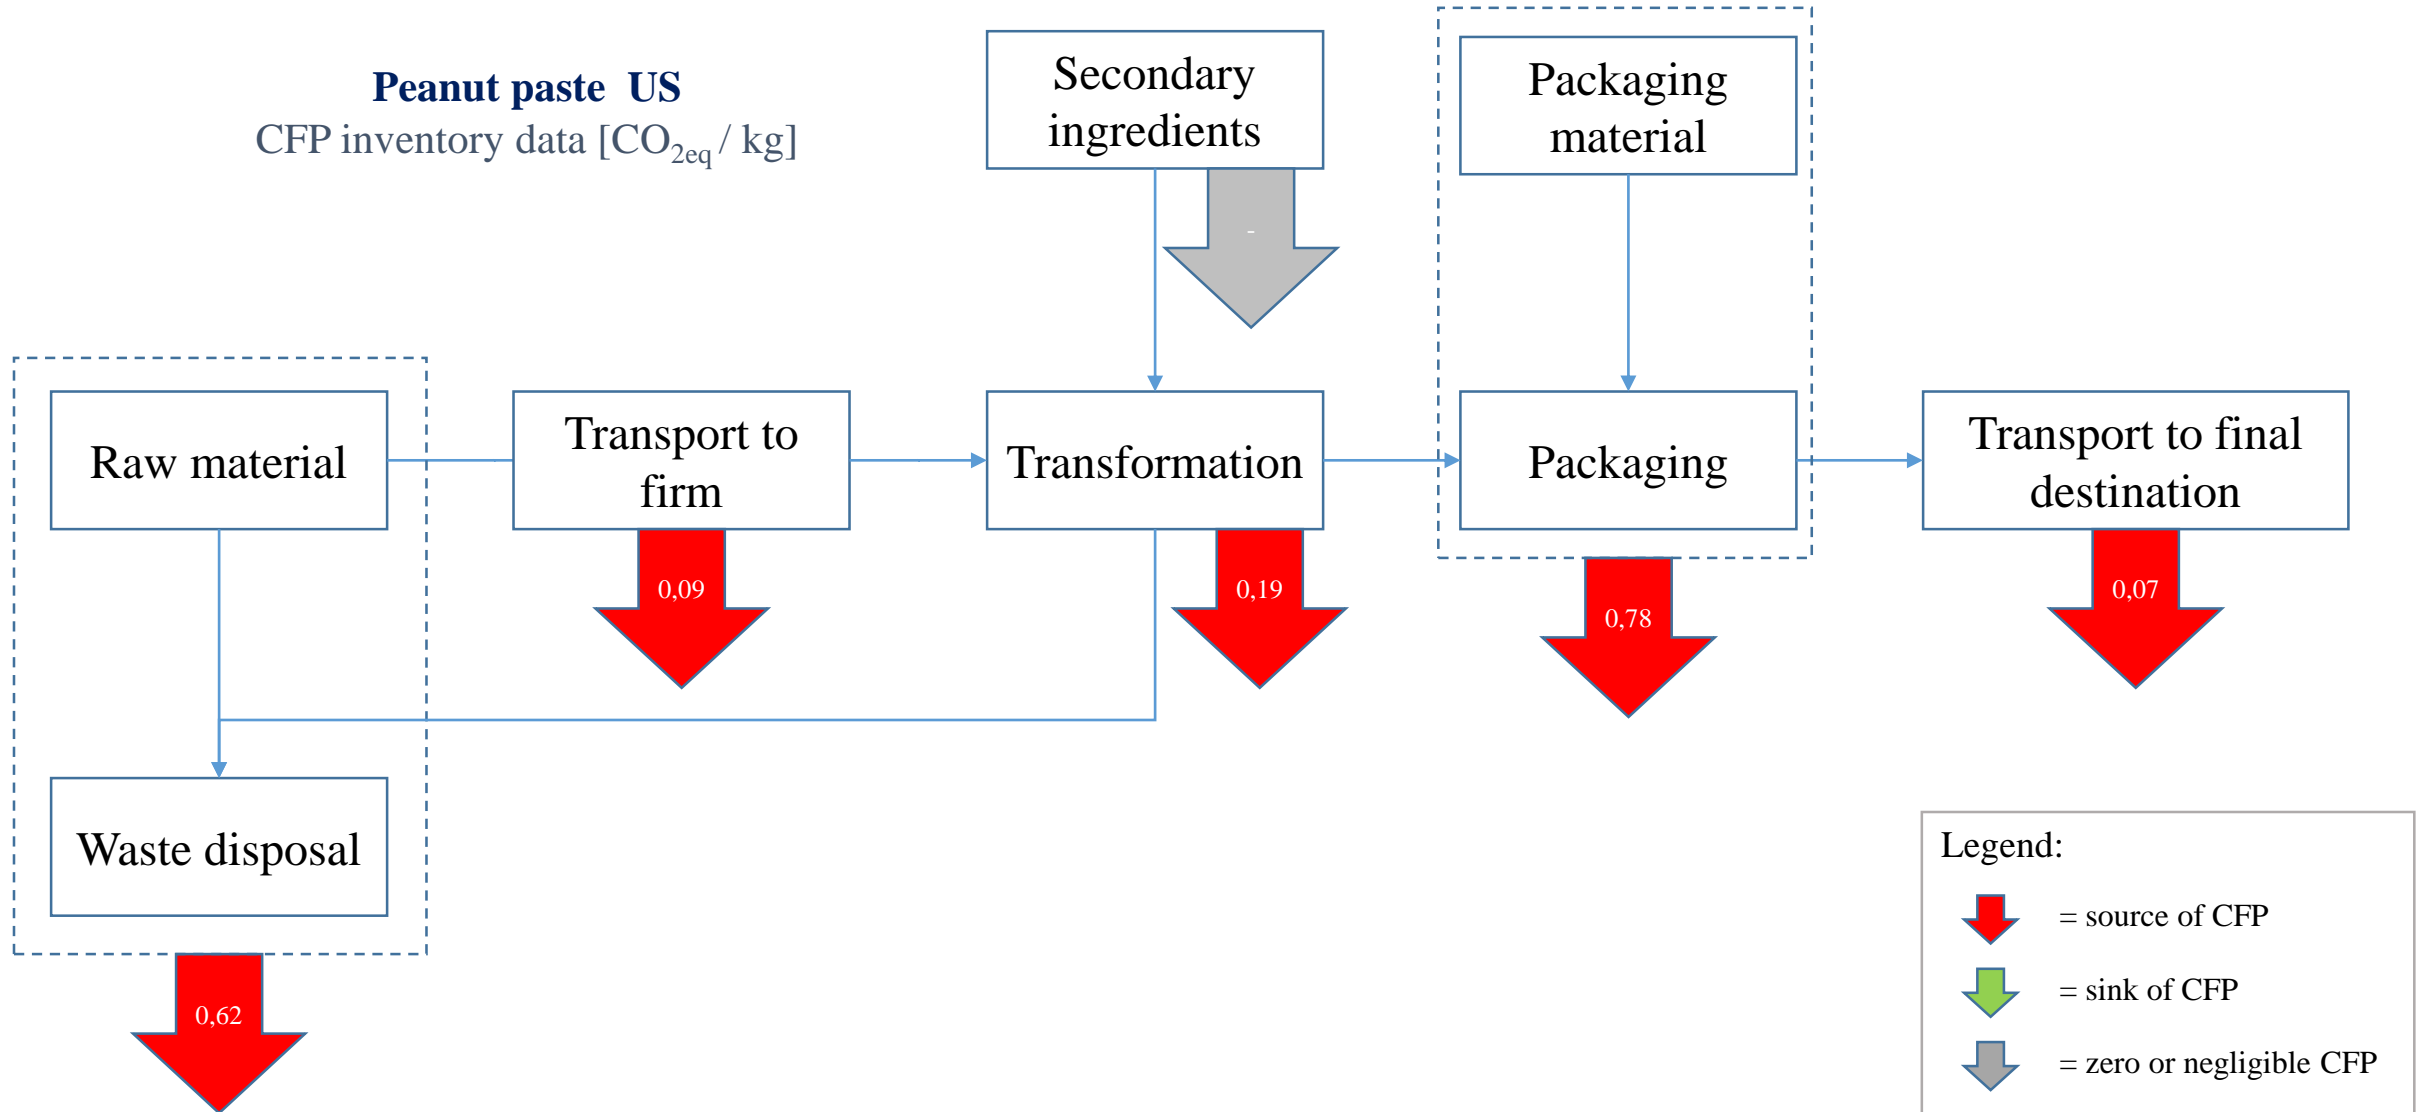

**Hazelnut paste EU**  
CFP inventory data [ $\text{CO}_{2\text{eq}} / \text{kg}$ ]

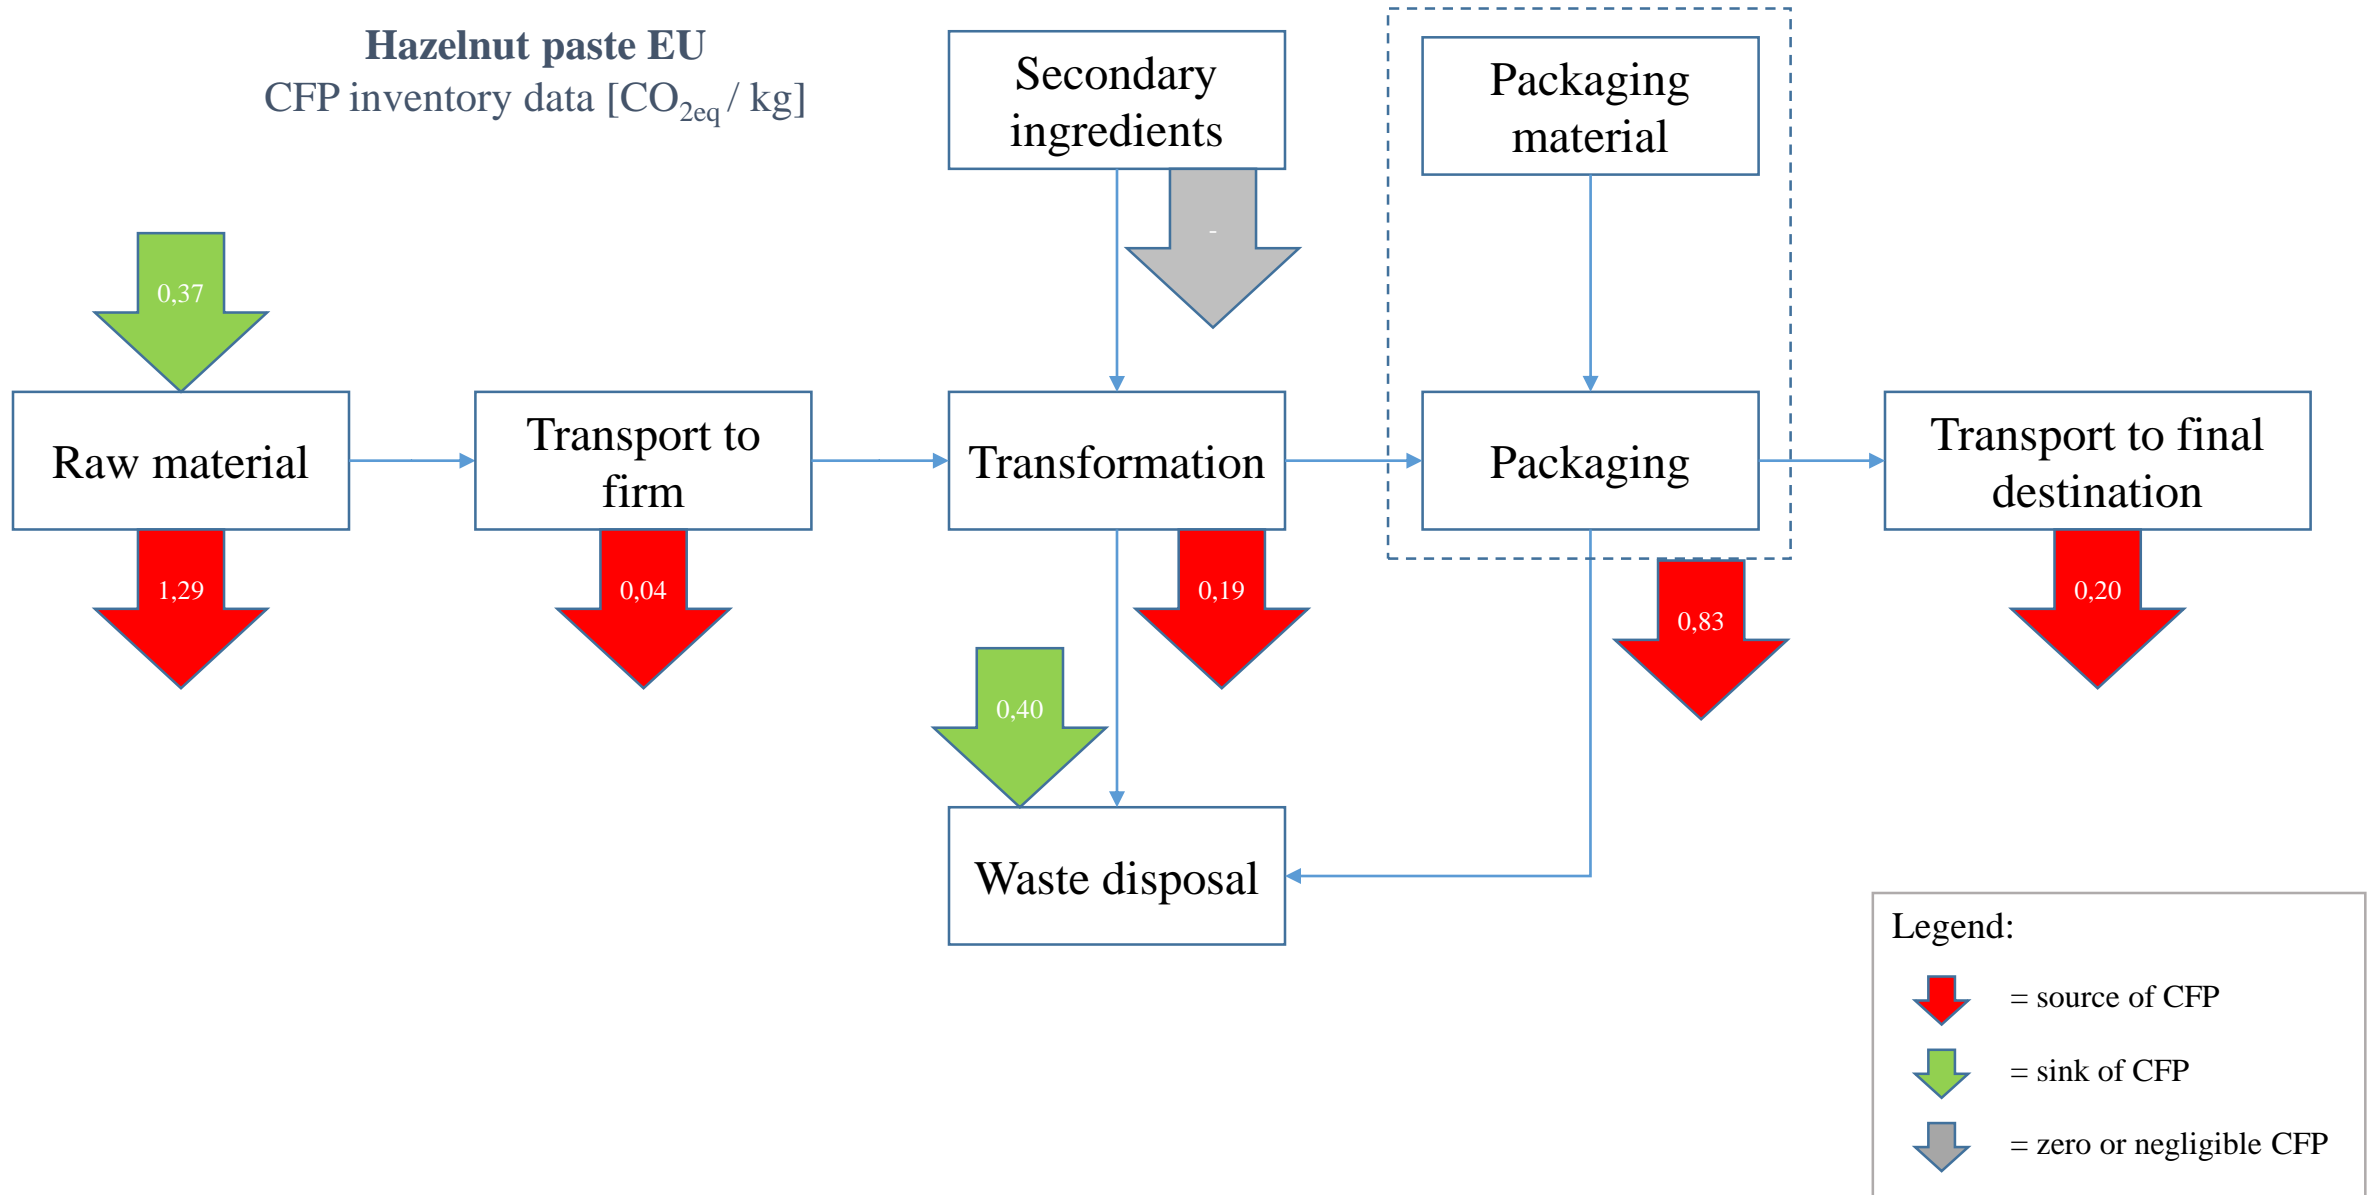

**Peanut paste EU**  
CFP inventory data [ $\text{CO}_{2\text{eq}}$  / kg]

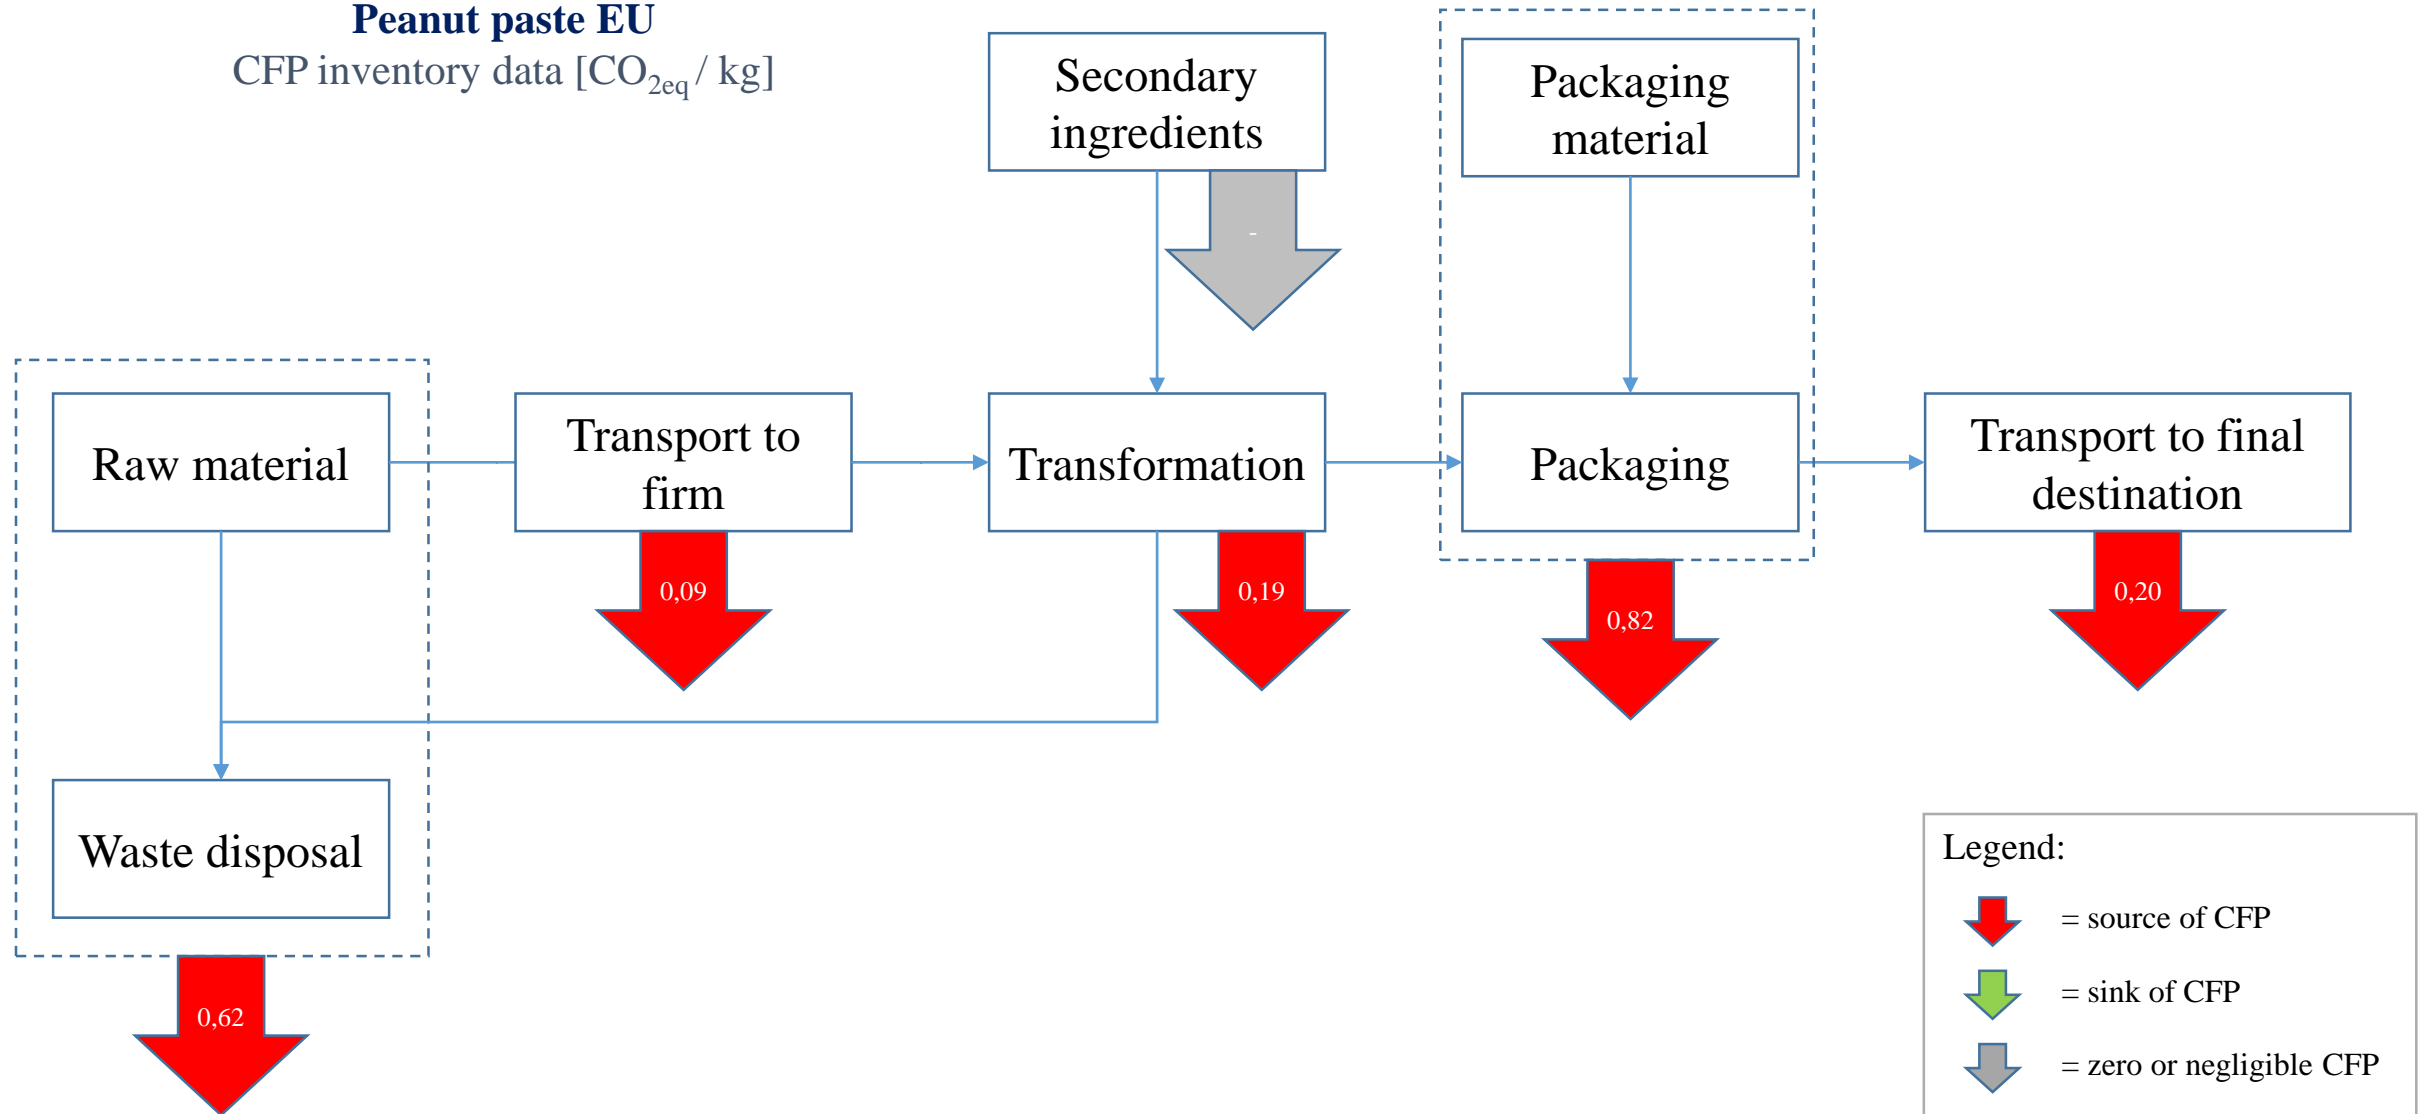

**Pistachio in bag**  
CFP inventory data [ $\text{CO}_{2\text{eq}}/\text{kg}$ ]

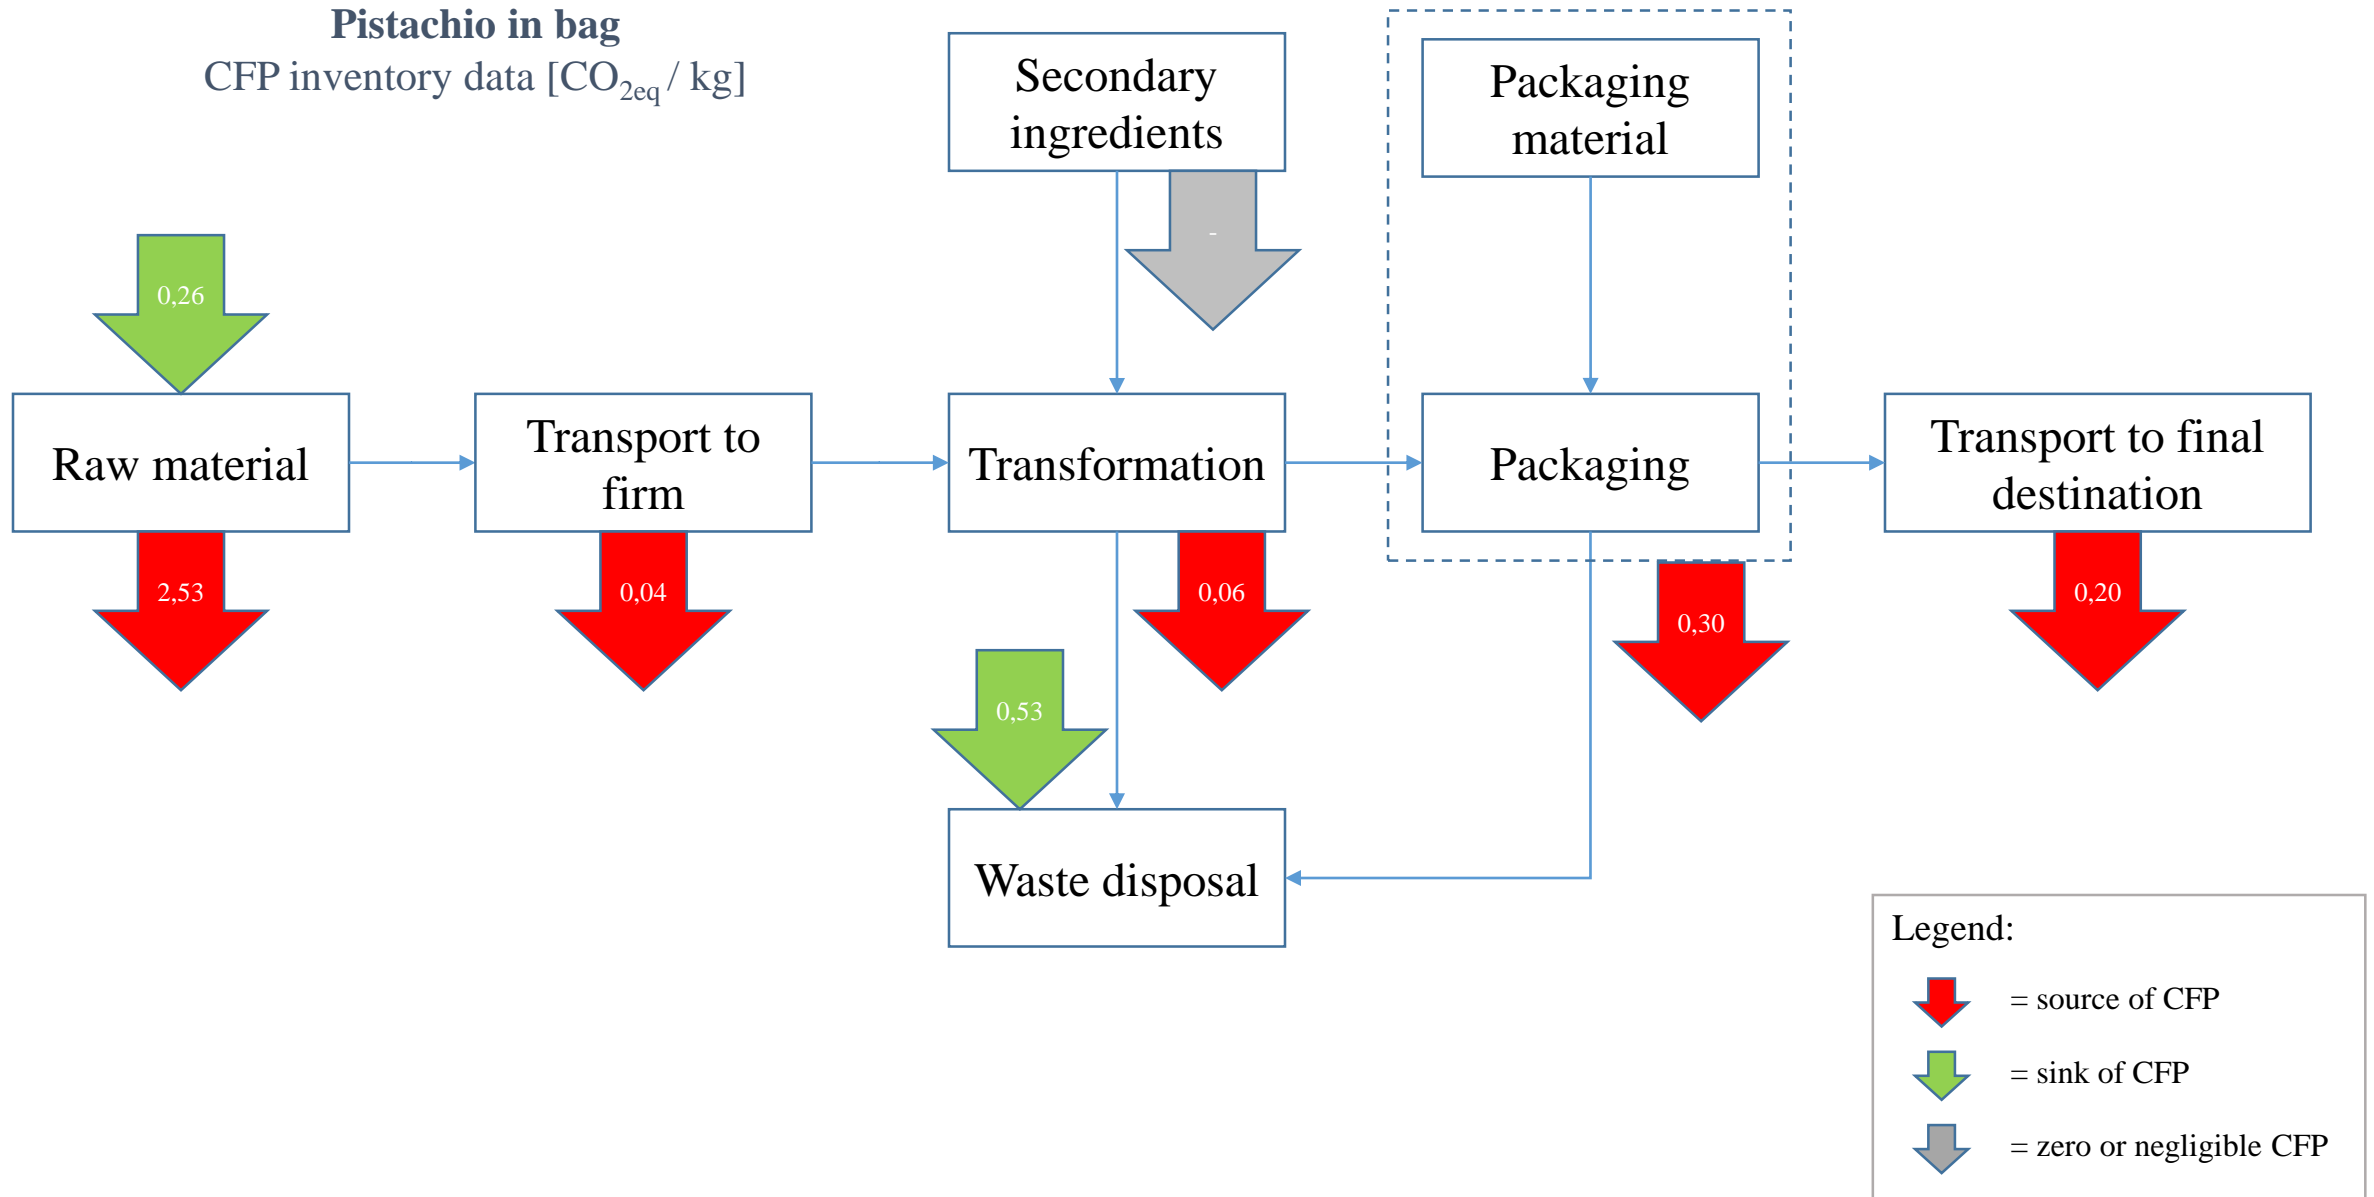

**Almond in bag**  
CFP inventory data [ $\text{CO}_{2\text{eq}} / \text{kg}$ ]

```

graph LR
    RM[Raw material] -- 0.14 (sink) --> RM
    RM -- 2.3 (source) --> T1[Transport to firm]
    T1 -- 0.03 (source) --> T1
    T1 --> TR[Transformation]
    SI[Secondary ingredients] -- 0.02 (negligible) --> TR
    TR -- 0.23 (sink) --> WD[Waste disposal]
    TR -- 0.10 (source) --> TR
    TR --> P[Packaging]
    PM[Packaging material] -- 0.02 (negligible) --> P
    P -- 0.34 (source) --> P
    P --> T2[Transport to final destination]
    T2 -- 0.20 (source) --> T2
    T2 --> WD
  
```

**Legend:**

- ↓ = source of CFP
- ↓ = sink of CFP
- ↓ = zero or negligible CFP

-  = source of CFP
-  = sink of CFP
-  = zero or negligible CFP



**Hazelnut spreadable cream US**  
CFP inventory data [ $\text{CO}_{2\text{eq}} / \text{kg}$ ]

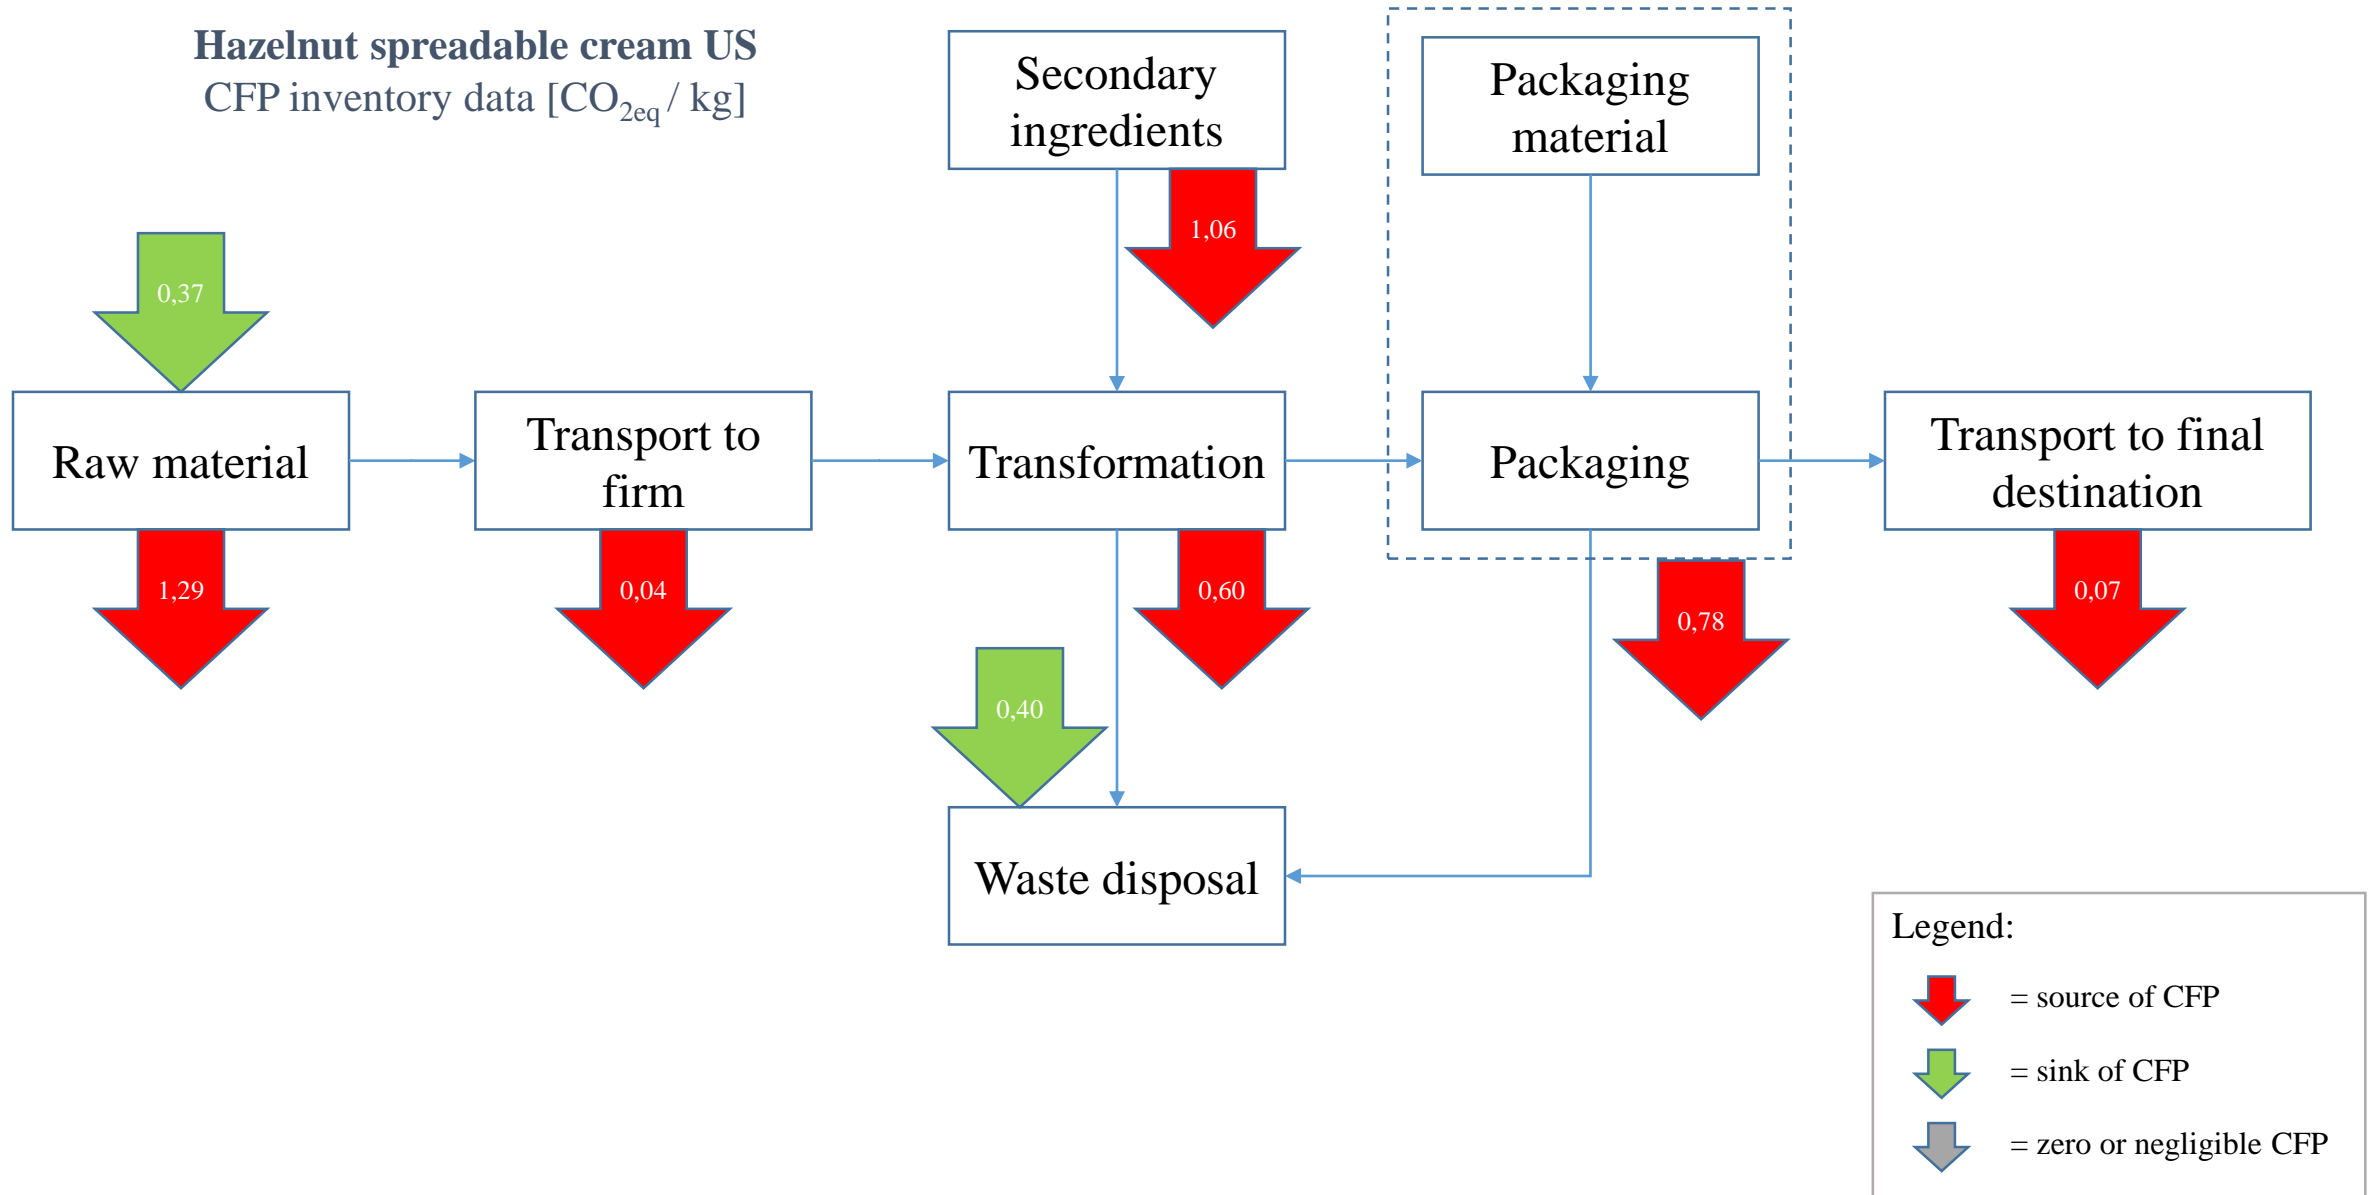

**Hazelnut spreadable cream EU**  
CFP inventory data [ $\text{CO}_{2\text{eq}}$  / kg]

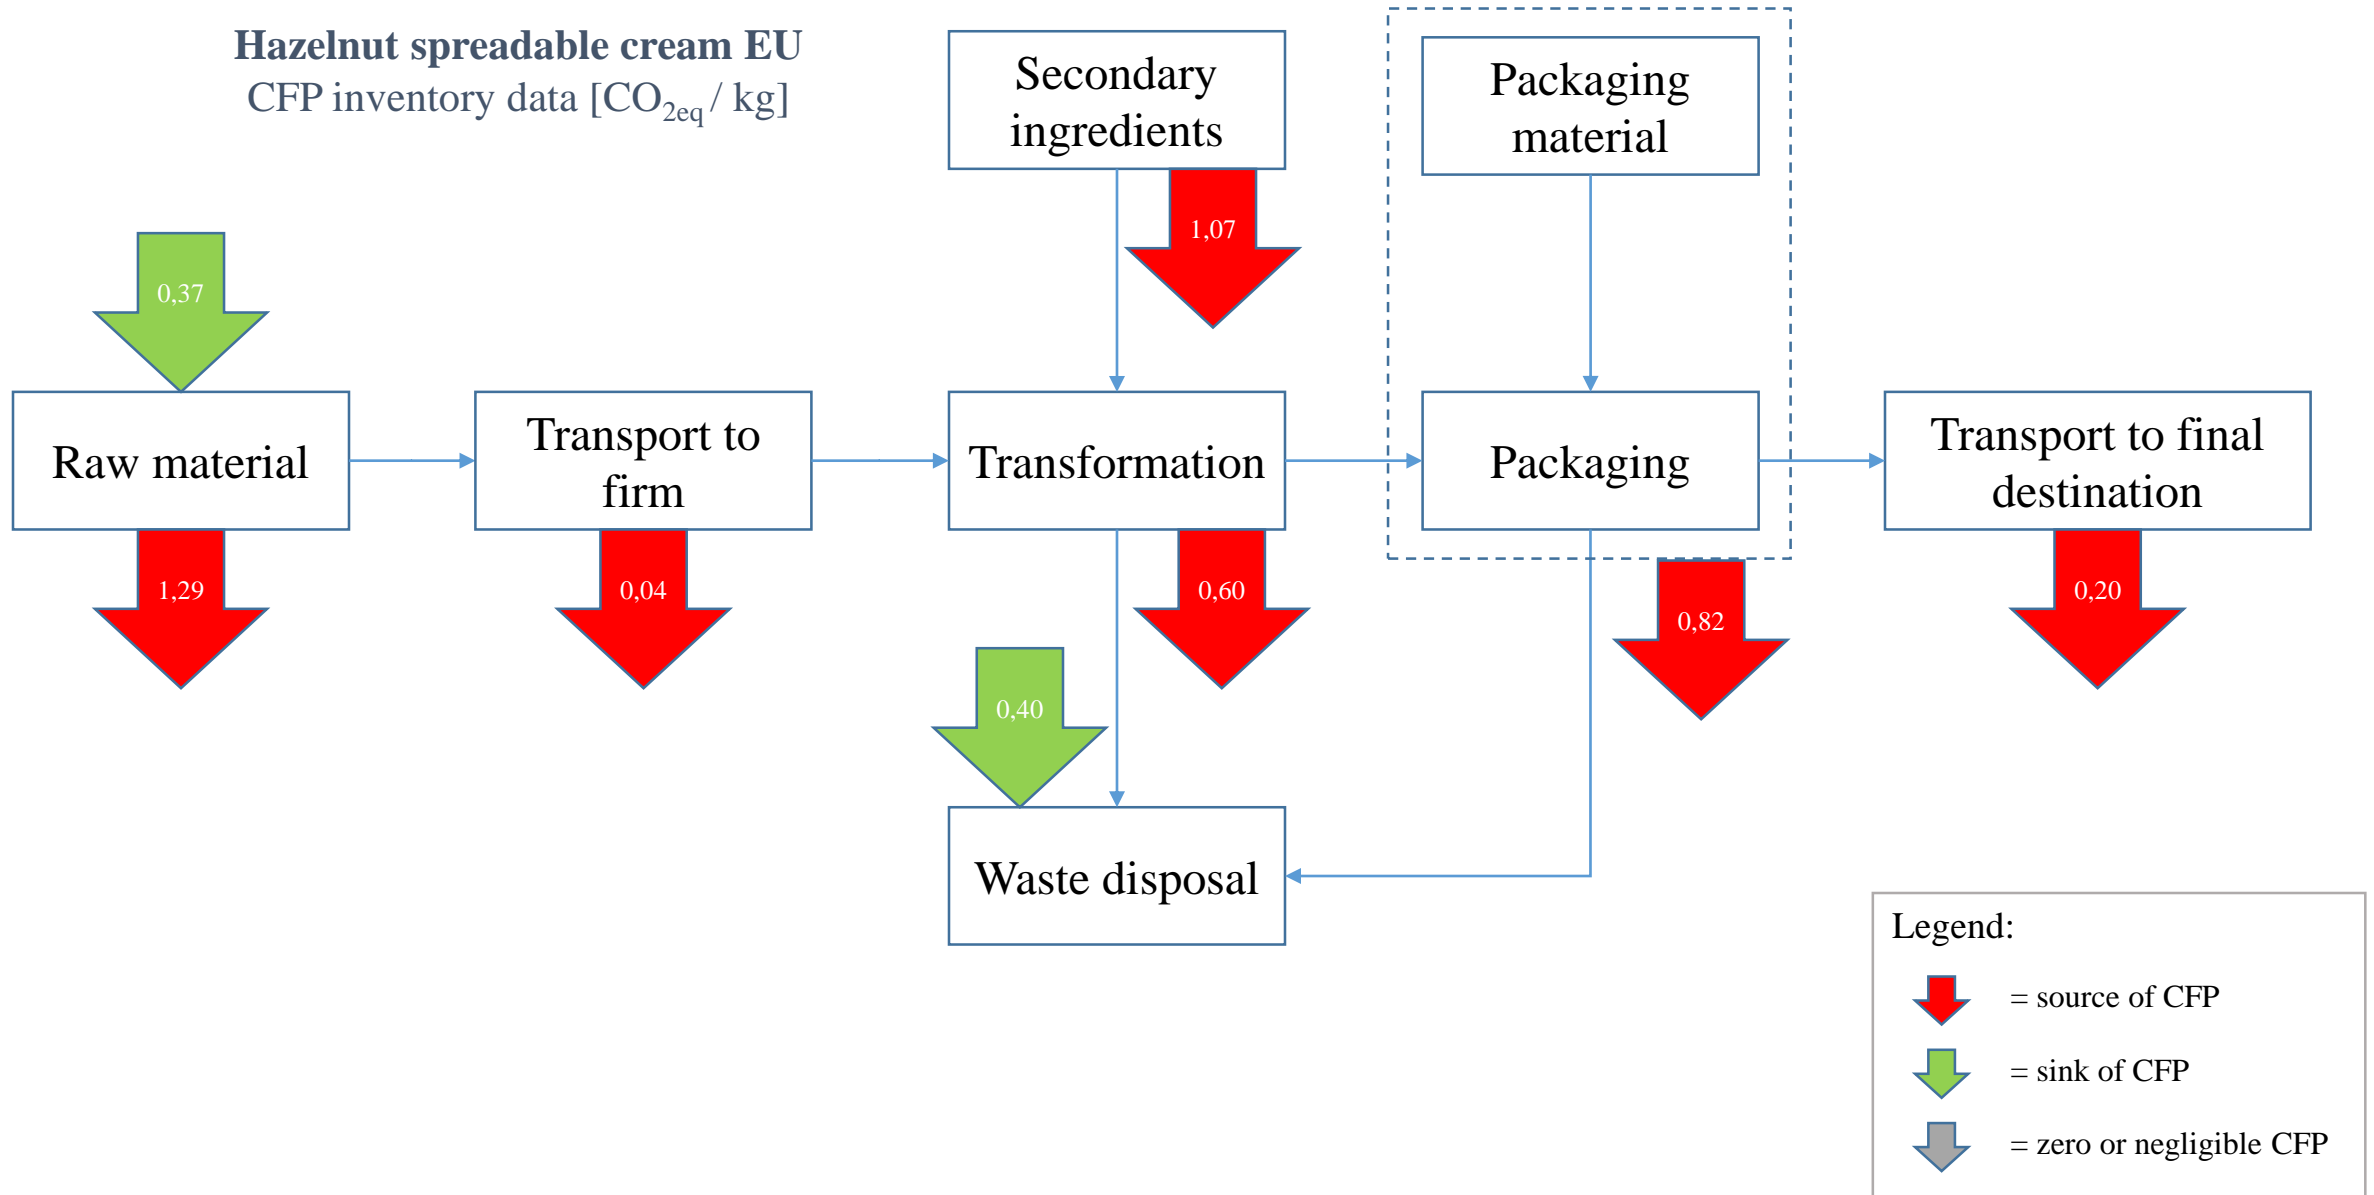

**Almond paste US**  
CFP inventory data [ $\text{CO}_{2\text{eq}}$  / kg]

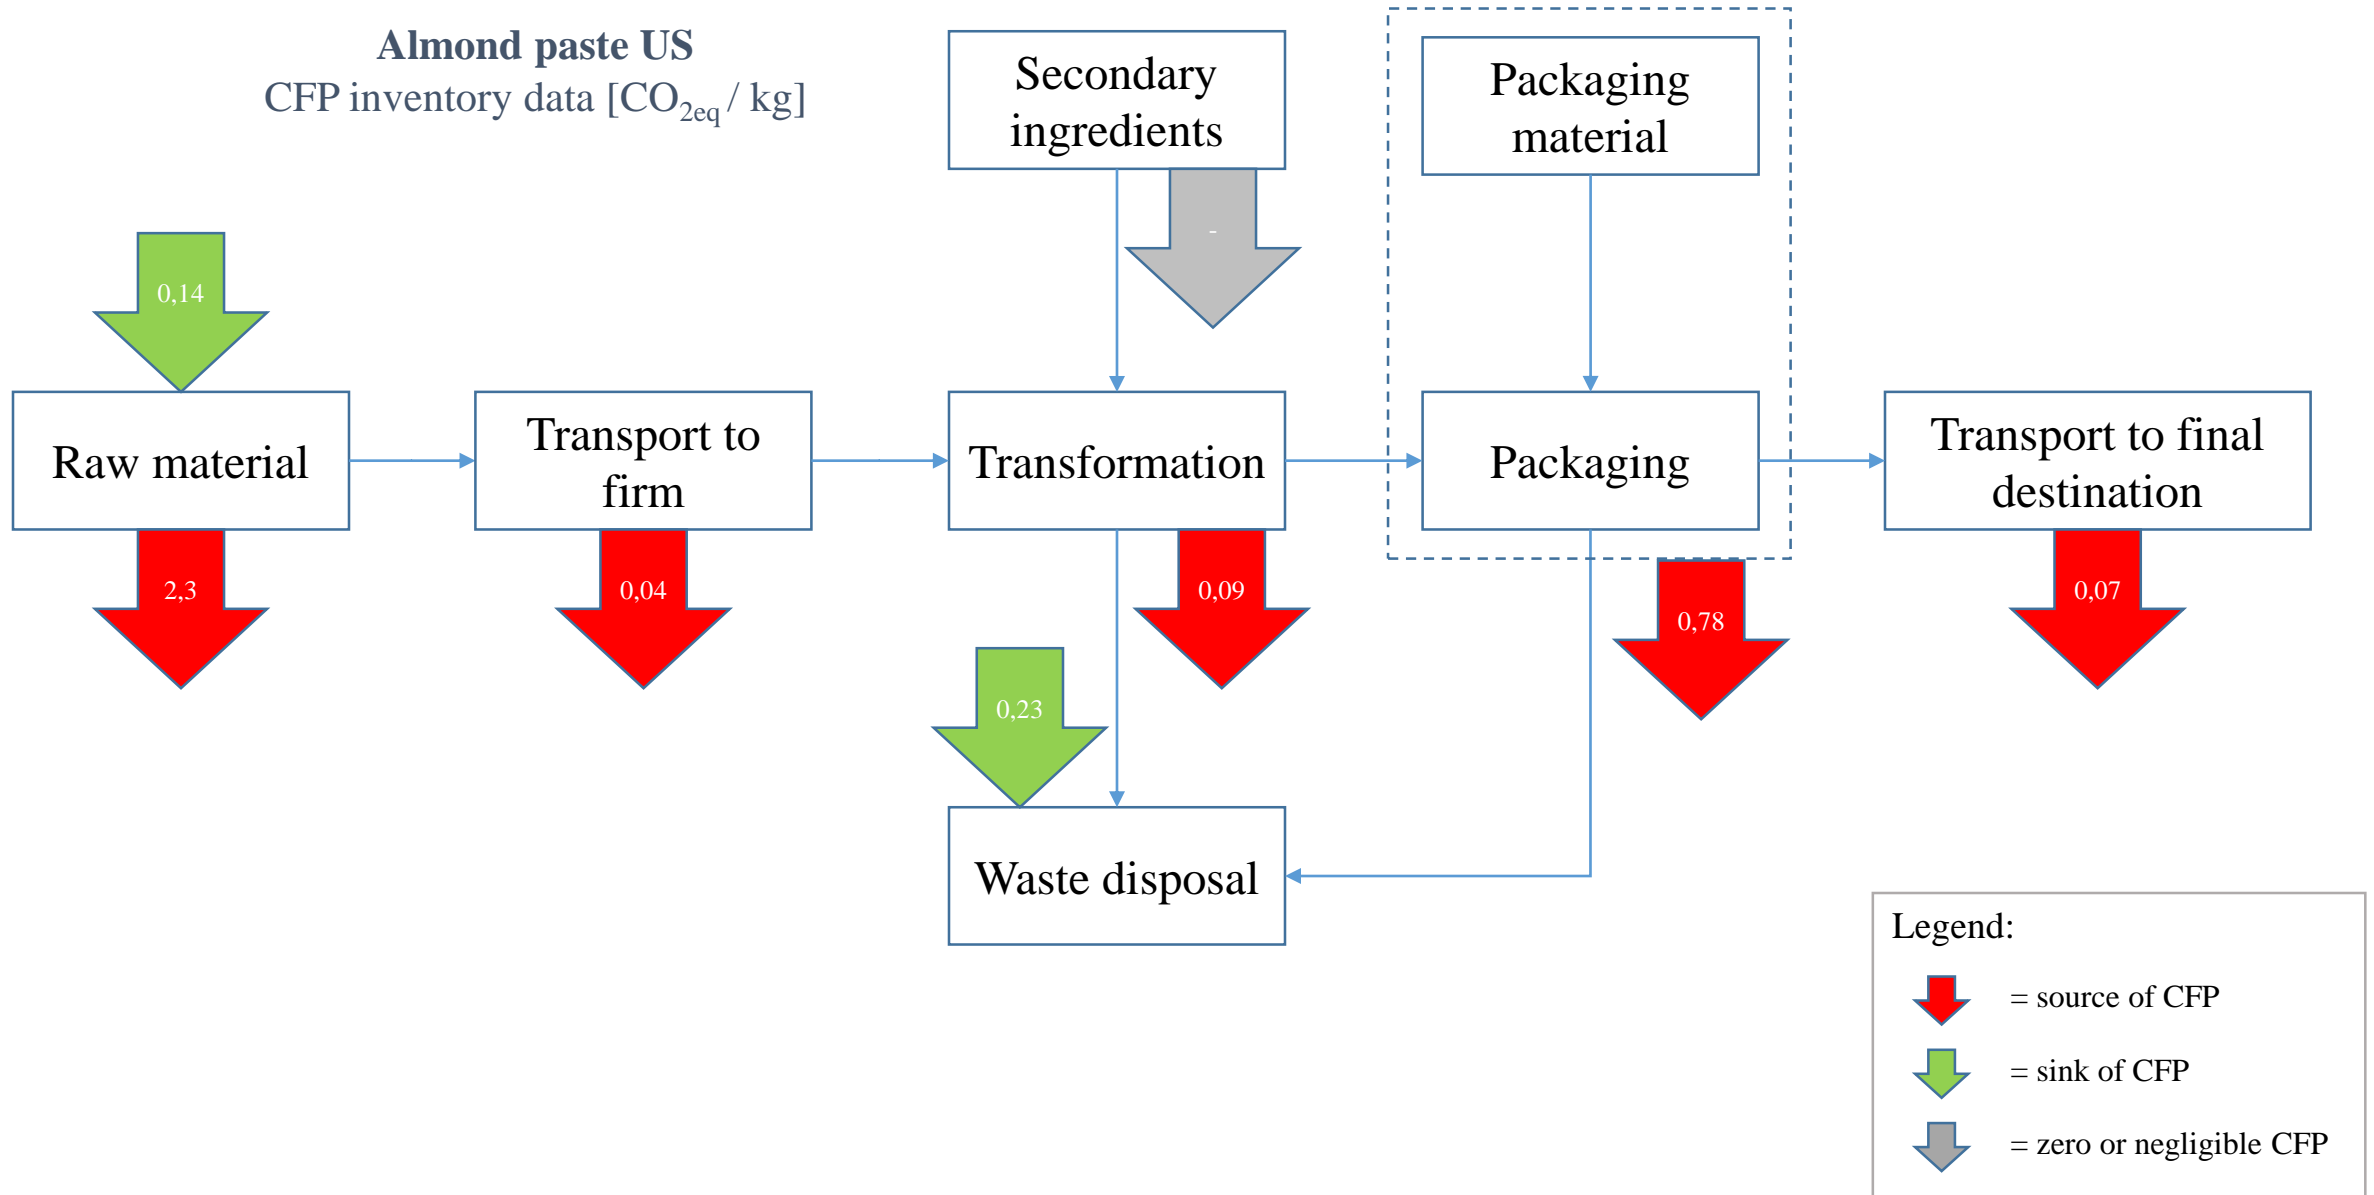

**Almond paste EU**  
CFP inventory data [ $\text{CO}_{2\text{eq}} / \text{kg}$ ]

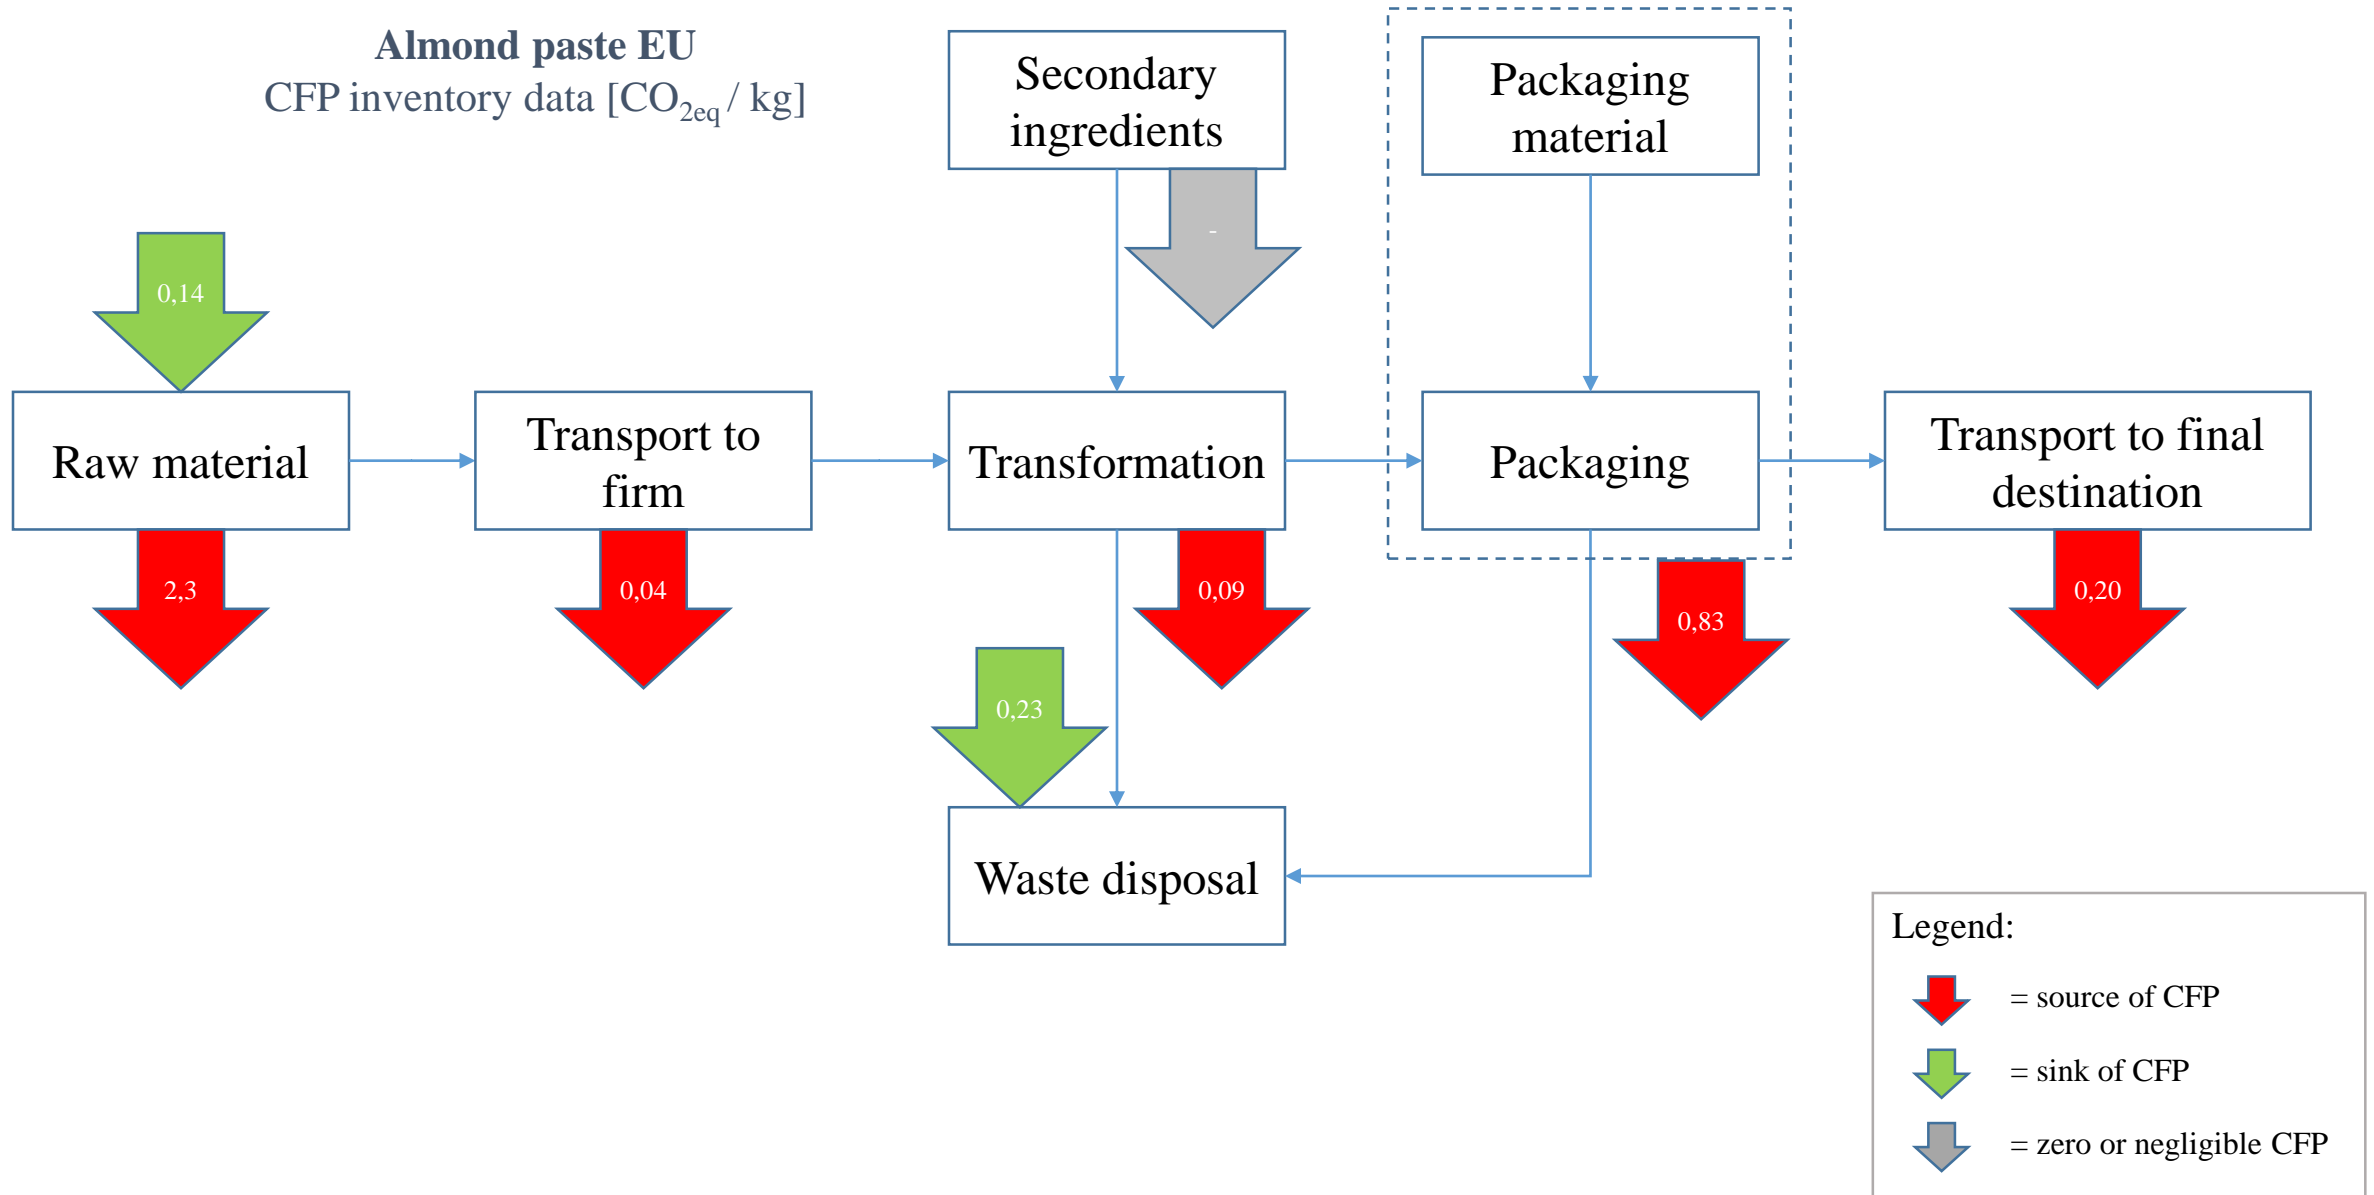

**Chocolate covered hazelnut**  
CFP inventory data [ $\text{CO}_{2\text{eq}} / \text{kg}$ ]

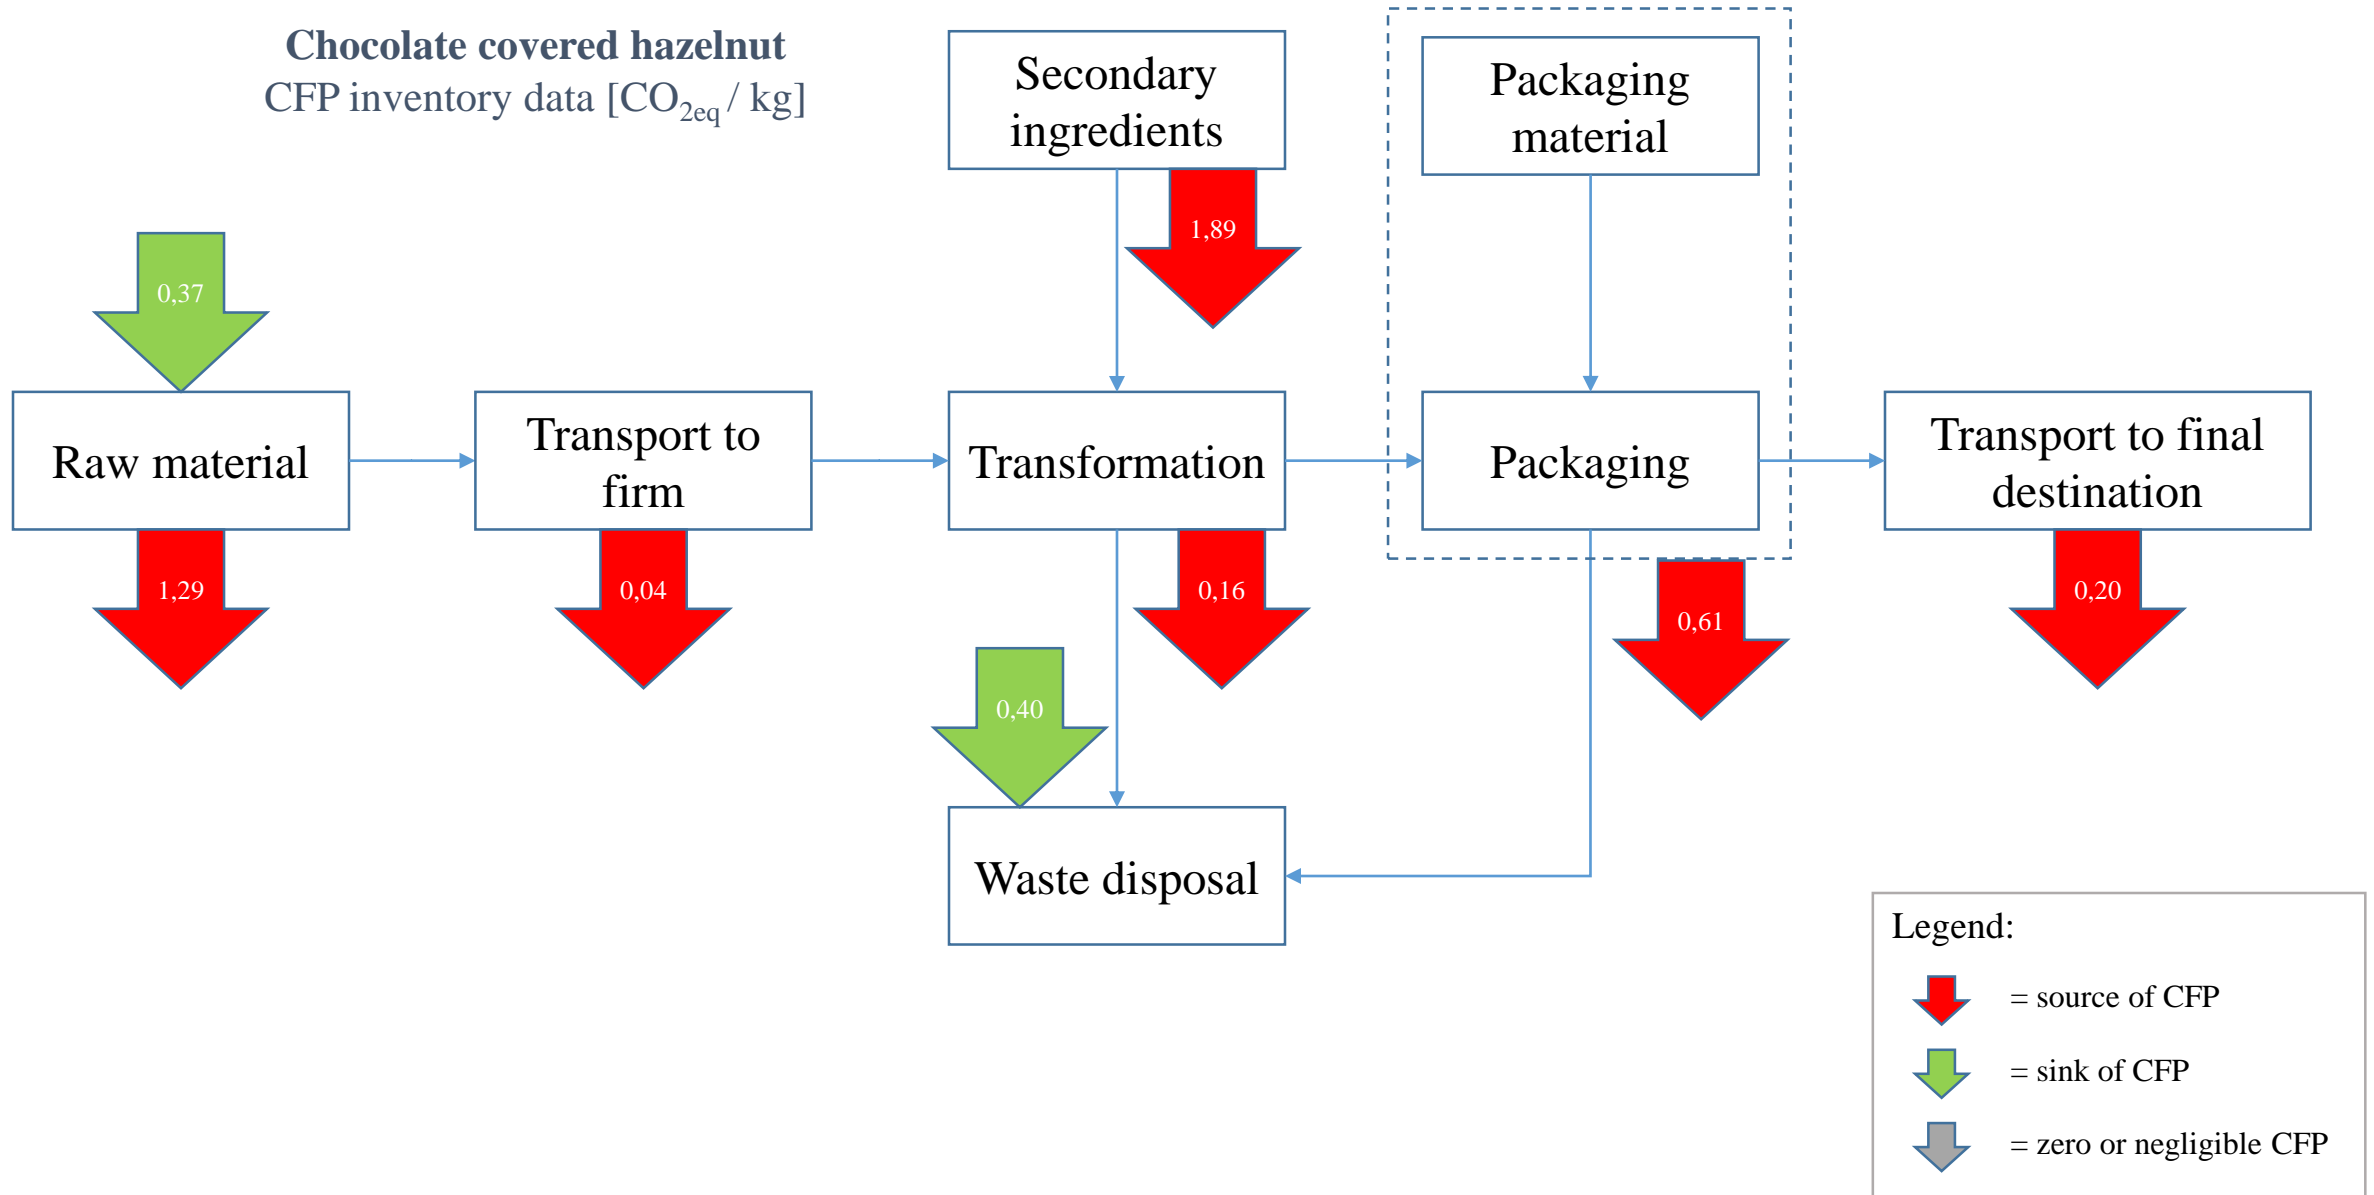

**Chocolate covered almond**  
CFP inventory data [ $\text{CO}_{2\text{eq}}$  / kg]

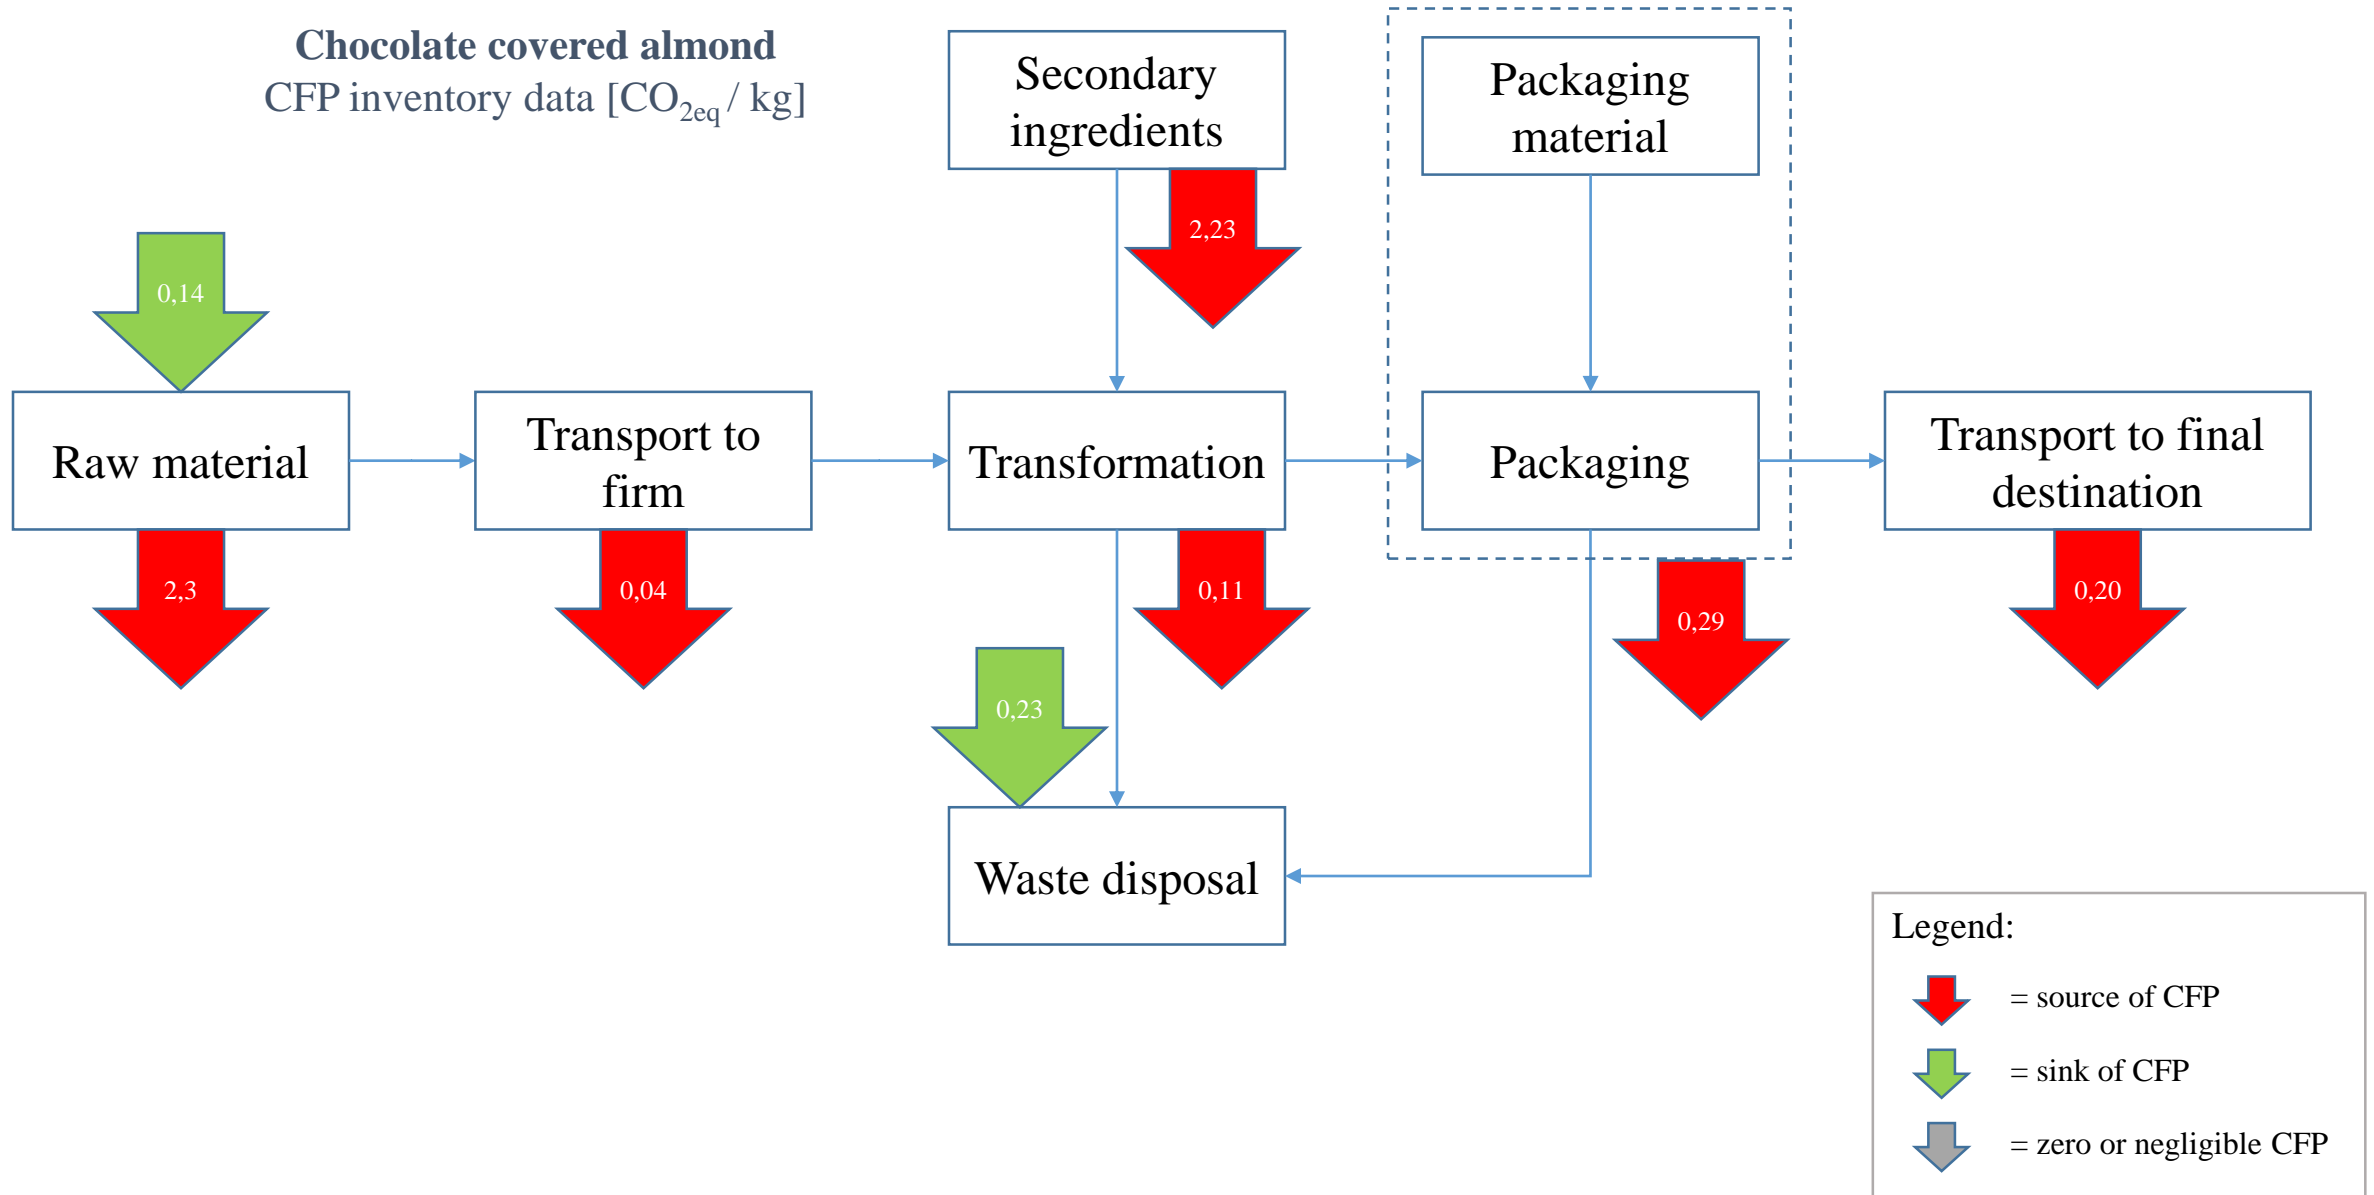

Supplement: s1 [file s1]
