# Supplementary material
Source: MDPI journal article supplement (https://www.mdpi.com/2071-1050/7/11/14917)
Supplement: s1 [file s1]

*Supplementary Information*

## **Carbon Footprint of Tree Nuts Based Consumer Products**

**Cities. *Sustainability* 2015, 7, 14917-14934**

**Roberto Volpe <sup>1</sup>, Simona Messineo <sup>2</sup>, Maurizio Volpe <sup>1</sup> and Antonio Messineo <sup>1,\*</sup>**

<sup>1</sup> Facoltà di Ingegneria e Architettura, Università degli Studi di Enna “Kore”, Cittadella Universitaria, Enna 94100, Italy;  
E-Mails: roberto.volpe@unikore.it (R.V.); maurizio.volpe@unikore.it (M.V.)

<sup>2</sup> Siciliacque S.p.A., Via Gioacchino di Marzo, Palermo 90144, Italy; E-Mail: messineo@siciliacquespa.it

\* Author to whom correspondence should be addressed; E-Mail: antonio.messineo@unikore.it;  
Tel.: +39-935-536-448; Fax: +39-935-536-951.

Academic Editors: Francesco Asdrubali and Pietro Buzzini

*Received: 23 July 2015 / Accepted: 3 November 2015 / Published:*

---

**Table S1.** Relation product category vs. transformation.

| Product                            | Bag/Jar<br>Net<br>Weight (g) | Cleaning<br>and<br>Calibration | Shell<br>Removal | Peeling | Soft<br>Skeen<br>Removal | Grinding | Deep<br>Frying | Fine<br>Grinding | Toasting | Hazelnut<br>Spread<br>Making | Cutting | Chocolate<br>Coating | Tamari<br>Coating | Raw Almond<br>Paste<br>Making | Toasted<br>Almond Paste<br>Making | Hazelnut<br>Paste<br>Making |
|------------------------------------|------------------------------|--------------------------------|------------------|---------|--------------------------|----------|----------------|------------------|----------|------------------------------|---------|----------------------|-------------------|-------------------------------|-----------------------------------|-----------------------------|
| Hazelnut in bag                    | 100–125                      | ×                              | ×                |         | ×                        | ×        |                | ×                | ×        |                              |         |                      |                   |                               |                                   |                             |
| Peanut in bag                      | 125                          | ×                              | ×                |         |                          | ×        | ×              |                  | ×        |                              |         |                      |                   |                               |                                   |                             |
| Hazelnut paste<br>US market        | 454                          | ×                              | ×                |         |                          | ×        |                |                  | ×        |                              |         |                      |                   |                               |                                   |                             |
| Peanut paste US<br>market          | 454                          | ×                              | ×                |         |                          | ×        |                |                  | ×        |                              | ×       |                      |                   |                               |                                   | ×                           |
| Hazelnut paste<br>EU market        | 200–400                      | ×                              | ×                |         |                          | ×        |                |                  | ×        |                              | ×       |                      |                   |                               |                                   | ×                           |
| Peanut paste EU<br>market          | 200–400                      | ×                              | ×                |         |                          | ×        |                |                  | ×        |                              | ×       |                      |                   |                               |                                   |                             |
| Pistacho in bag                    | 100–125                      | ×                              | ×                | ×       |                          |          |                |                  | ×        |                              |         |                      |                   |                               |                                   |                             |
| Almond in bag                      | 100–125                      | ×                              | ×                | ×       | ×                        | ×        |                | ×                | ×        |                              |         |                      | ×                 |                               |                                   |                             |
| Hazelnut spread<br>cream in jar US | 454                          | ×                              | ×                |         |                          |          |                |                  |          | ×                            |         |                      |                   |                               |                                   |                             |
| Hazelnut spread<br>cream in jar EU | 200–400                      | ×                              | ×                |         |                          |          |                |                  |          | ×                            |         |                      |                   |                               |                                   |                             |
| Almond paste<br>US market          | 454                          | ×                              | ×                | ×       |                          | ×        |                |                  | ×        |                              |         |                      |                   | ×                             | ×                                 |                             |
| Almond paste<br>EU market          | 180–400                      | ×                              | ×                | ×       |                          | ×        |                |                  | ×        |                              |         |                      |                   | ×                             | ×                                 |                             |
| Chocolate<br>covered hazelnut      | 100                          | ×                              | ×                | ×       | ×                        |          |                |                  |          |                              |         | ×                    |                   |                               |                                   |                             |
| Chocolate<br>covered almond        | 100                          | ×                              | ×                | ×       | ×                        |          |                |                  |          |                              |         | ×                    |                   |                               |                                   |                             |

**Table S2.** Products sold by country of destination.

| Products                    | Product Statistics      |                  |                            | Country of Destination |          |         |         |         |         |          |
|-----------------------------|-------------------------|------------------|----------------------------|------------------------|----------|---------|---------|---------|---------|----------|
|                             | Net Weight Per Unit (g) | Sold Units (no.) | Sold Total Net Weight (kg) | ITA (kg)               | FRA (kg) | UK (kg) | CH (kg) | DE (kg) | SE (kg) | USA (kg) |
| pistachio paste             | 80                      | 9464             | 757                        | 29                     | 702      | 26      | -       | -       | -       | -        |
| chocolate covered almonds   | 100                     | 60               | 6                          | -                      | -        | 6       | -       | -       | -       | -        |
| chocolate covered almonds   | 100                     | 264              | 26                         | -                      | -        | 26      | -       | -       | -       | -        |
| chocolate covered hazelnuts | 100                     | 96               | 10                         | -                      | -        | 10      | -       | -       | -       | -        |
| peeled almonds              | 100                     | 798              | 80                         | 32                     | -        | 48      | -       | -       | -       | -        |
| peeled almonds              | 100                     | 180              | 18                         | 18                     | -        | -       | -       | -       | -       | -        |
| peeled almonds              | 100                     | 728              | 73                         | -                      | -        | 73      | -       | -       | -       | -        |
| raw almonds                 | 100                     | 1176             | 118                        | 29                     | -        | 88      | -       | -       | -       | -        |
| raw almonds                 | 100                     | 180              | 18                         | 18                     | -        | -       | -       | -       | -       | -        |
| raw almonds                 | 100                     | 574              | 57                         | -                      | -        | 57      | -       | -       | -       | -        |
| chocolate covered almonds   | 100                     | 300              | 30                         | 10                     | -        | 20      | -       | -       | -       | -        |
| chocolate covered almonds   | 100                     | 576              | 58                         | 58                     | -        | -       | -       | -       | -       | -        |
| chocolate covered almonds   | 100                     | 74               | 7                          | 7                      | -        | -       | 0.2     | -       | -       | -        |
| chocolate covered almonds   | 100                     | 75               | 8                          | 8                      | -        | -       | -       | -       | -       | -        |
| chocolate covered almonds   | 100                     | 2280             | 228                        | 11                     | 202      | 16      | -       | -       | -       | -        |
| chocolate covered almonds   | 100                     | 2112             | 211                        | 211                    | -        | -       | -       | -       | -       | -        |
| chocolate covered almonds   | 100                     | 2196             | 220                        | -                      | 220      | -       | -       | -       | -       | -        |
| hazelnuts                   | 100                     | 434              | 43                         | 39                     | -        | 4       | -       | -       | -       | -        |
| hazelnuts                   | 100                     | 108              | 11                         | 11                     | -        | -       | -       | -       | -       | -        |
| hazelnuts                   | 100                     | 672              | 67                         | -                      | -        | 67      | -       | -       | -       | -        |
| chocolate covered hazelnuts | 100                     | 38               | 4                          | 4                      | -        | -       | 0.2     | -       | -       | -        |
| chocolate covered hazelnuts | 100                     | 513              | 51                         | 42                     | -        | 10      | -       | -       | -       | -        |
| chocolate covered hazelnuts | 100                     | 64               | 6                          | 6                      | -        | -       | 0.2     | -       | -       | -        |
| pistachios                  | 100                     | 840              | 84                         | 84                     | -        | -       | -       | -       | -       | -        |
| salted peanuts              | 125                     | 182,688          | 22,836                     | -                      | -        | -       | -       | 22,836  | -       | -        |
| almond flour                | 125                     | 183,528          | 22,941                     | -                      | -        | -       | -       | 22,941  | -       | -        |
| peeled almonds              | 125                     | 10,080           | 1260                       | 1260                   | -        | -       | -       | -       | -       | -        |
| peeled almonds              | 125                     | 229,320          | 28,665                     | 28,665                 | -        | -       | -       | -       | -       | -        |
| peeled almonds              | 125                     | 13,728           | 1716                       | 1716                   | -        | -       | -       | -       | -       | -        |

Table S2. *Cont.*

| Products                 | Product Statistics      |                  |                            | Country of Destination |          |         |         |         |         |          |
|--------------------------|-------------------------|------------------|----------------------------|------------------------|----------|---------|---------|---------|---------|----------|
|                          | Net Weight Per Unit (g) | Sold Units (no.) | Sold Total Net Weight (kg) | ITA (kg)               | FRA (kg) | UK (kg) | CH (kg) | DE (kg) | SE (kg) | USA (kg) |
| almonds                  | 125                     | 8640             | 1080                       | 1080                   | -        | -       | -       | -       | -       | -        |
| almonds                  | 125                     | 12,792           | 1599                       | 1599                   | -        | -       | -       | -       | -       | -        |
| grinded hazelnuts        | 125                     | 2880             | 360                        | 360                    | -        | -       | -       | -       | -       | -        |
| hazelnuts                | 125                     | 2880             | 360                        | 360                    | -        | -       | -       | -       | -       | -        |
| hazelnuts                | 125                     | 4992             | 624                        | 624                    | -        | -       | -       | -       | -       | -        |
| toasted hazelnuts        | 125                     | 2880             | 360                        | 360                    | -        | -       | -       | -       | -       | -        |
| toasted hazelnuts        | 125                     | 3744             | 468                        | 468                    | -        | -       | -       | -       | -       | -        |
| hazelnuts flour          | 125                     | 118,176          | 14,772                     | -                      | -        | -       | -       | 14,772  | -       | -        |
| raw peeled almond spread | 180                     | 660              | 119                        | -                      | -        | 119     | -       | -       | -       | -        |
| hazelnut paste           | 180                     | 372              | 67                         | -                      | -        | 67      | -       | -       | -       | -        |
| hazelnut paste           | 180                     | 1040             | 187                        | 99                     | -        | 86      | -       | -       | -       | 2        |
| pistachio paste          | 180                     | 1273             | 229                        | 40                     | -        | -       | -       | -       | 189     | -        |
| almond paste             | 180                     | 1399             | 252                        | 47                     | -        | 203     | -       | -       | -       | 2        |
| hazelnut spread          | 200                     | 336              | 67                         | -                      | -        | 67      | -       | -       | -       | -        |
| hazelnut paste           | 200                     | 1755             | 351                        | 255                    | -        | 96      | 0.4     | -       | -       | -        |
| almond paste             | 300                     | 24,301           | 7290                       | 0.3                    | 7290     | -       | -       | -       | -       | -        |
| almond paste             | 300                     | 840              | 252                        | -                      | 252      | -       | -       | -       | -       | -        |
| almond paste             | 300                     | 16,052           | 4816                       | 1                      | 4815     | -       | -       | -       | -       | -        |
| almond paste             | 300                     | 88,238           | 26,471                     | 1                      | 26,471   | -       | -       | -       | -       | -        |
| hazelnut paste           | 300                     | 15,152           | 4546                       | 1                      | 4545     | -       | -       | -       | -       | -        |
| hazelnut spread          | 400                     | 18,210           | 7284                       | 602                    | 6682     | -       | -       | -       | -       | -        |
| hazelnut paste           | 400                     | 1392             | 557                        | -                      | 557      | -       | -       | -       | -       | -        |
| almond paste             | 454                     | 4356             | 1978                       | -                      | -        | -       | -       | -       | -       | 1978     |
| hazelnut paste           | 454                     | 1452             | 659                        | -                      | -        | -       | -       | -       | -       | 659      |
